# Supplementary material
Source: PubMed Central journal article supplement (PMC2729602)
Supplement: tpc.109.065805_1.pdf [file tpc.109.065805_1.pdf]

**Supplemental Figure 1. Description of phylogenetic analysis, including the models used, sequence database accession numbers, alternative topology tests and assessment of hidden paralogy for the phylogeny shown on Figure 1A.**

**Supplemental Figure 1A-C.** Phylogeny of the putative L-fucose permease encoding gene family, demonstrating a candidate fungi-to-plant gene transfer. Our comparative genomic analyses demonstrated that this protein family is, with the exception of the single plant gene, restricted to a diverse group of prokaryotes and the fungi. This taxon sampling suggests a prokaryote-to-fungi gene transfer. We also detected a putative homologue of this protein encoded by the *Physcomitrella patens* genome. This plant gene grouped with moderate to strong support with and within the fungal phylogenetic group (black arrows mark the key branching relationships – **1A**). To test the topological support for placement of the *Physcomitrella* gene we performed a second phylogenetic analyses (**1B**) removing distantly related prokaryote sequences and adjusting the alignment character sampling. Phylogenetic analyses based upon this second alignment demonstrated stronger bootstrap support for the placement of the plant gene within the fungi (81/80% bootstrap support – marked by a red arrow). To test further the placement of *Physcomitrella* gene within the Fungi we constrained a monophyletic branching order of the fungi and calculated alternative tree topologies using distance and parsimony methods (Swofford, 2002). For each alternative topology we re-calculated branch lengths using ML (Foster, 2004) and compared the resulting topologies with the MrBayes (Ronquist and Huelsenbeck, 2003) and PhyML (Guindon and Gascuel, 2003) topologies using the AU and SH test in Consel (Shimodaira and Hasegawa, 2001). We found that we could reject all three alternative topologies, with fungal monophyly enforced, at the 2.9% confidence level or lower. This strongly suggests that the plant sequence branches within the Fungi, probably as a result of a fungi-to-plant horizontal gene transfer.

The phylogeny was calculated from an alignment of 98 sequences and 341 amino acid characters (**1A**) and an alignment of 62 sequences and 349 amino acid characters (**1B**). Modelgenerator (Keane et al., 2004) analysis demonstrated that a WAG substitution matrix and a  $\Gamma$  distribution ( $\alpha = 1.13$ ) model of site rate heterogeneity were the most appropriate parameters for the **1A** data set, while a WAG substitution matrix and a  $\Gamma$  distribution ( $\alpha = 1.16$ ) were the most appropriate parameters for the **1B** data set. The phylogenetic trees shown were calculated using the fast maximum likelihood program phyML, with 1000 bootstrap replicates and SH analyses of each node (as described in the main text of the paper). To test the topological result further, we also ran a MrBayes analysis and 100 RAxML (Stamatakis, 2006) bootstrap replicates (as described in the main

text of the paper). The key for each tree shows the short-hand description of topology support values in the order Bayesian posterior probability / % bootstrap support (phyML+RAxML). Shaded discs represent nodes with ‘robust’ topology support values, while rings demonstrate nodes with ‘moderate’ topology support values (actual cut off values are given on the key). For key nodes the actual support values are shown in the order Bayesian Posterior Probability / 1000 phyML bootstraps / 100 RAxML bootstraps / phyML node-by-node SH test.

The species are labelled with an identifier code in square brackets, relating to the source of sequence data. These include GenBank protein accession codes and GI numbers, Broad Institute gene identifiers (in some cases curtailed for program compatibility reasons), and DOE JGI gene identifiers with a 4 letter species codes that we have added. The sources for all the genome sequences used in the pipeline analysis are listed in Supplemental Table 1. All additional non-genome project sequences are from GenBank. As genome sequence identifiers are continually updated, we have provided additional supplementary material with all the sequences used as Seaview (Galtier et al., 1996) alignment files.

To compare the HGT scenarios with an alternative hypothesis of gene duplication events and gene loss (hidden paralogy) we drew a cladogram demonstrating gene duplication and gene loss events that would be necessary to generate the phylogenetic results shown without a HGT event (1C). These trees were based on an underlying eukaryotic species phylogeny. Because there is uncertainty about the relative branching order of many eukaryotic groups, we restricted the underlying eukaryotic species phylogeny to identified species relationships among the Plantae, the Fungi, and their sister group the metazoa (Rodriguez-Ezpeleta et al., 2005; James et al., 2006) and the kingdom Plantae. As such, this analysis underestimates the number of gene duplication and loss events required for the alternative hypothesis of hidden paralogy. Only duplication (D) and loss (L) events required to invoke the hidden paralogy are marked. For the L-fucose permease the taxon distribution is highly restricted to fungi, prokaryotes and one plant. This taxon distribution itself suggests HGT. However, for hidden paralogy to explain the branching of the plant within the fungal clade, given the taxon sampling available for this analysis, a minimum of 10 independent gene loss events and 2 gene duplication events are required. This compares to the scenario of a single fungi-to-plant HGT event.

1A

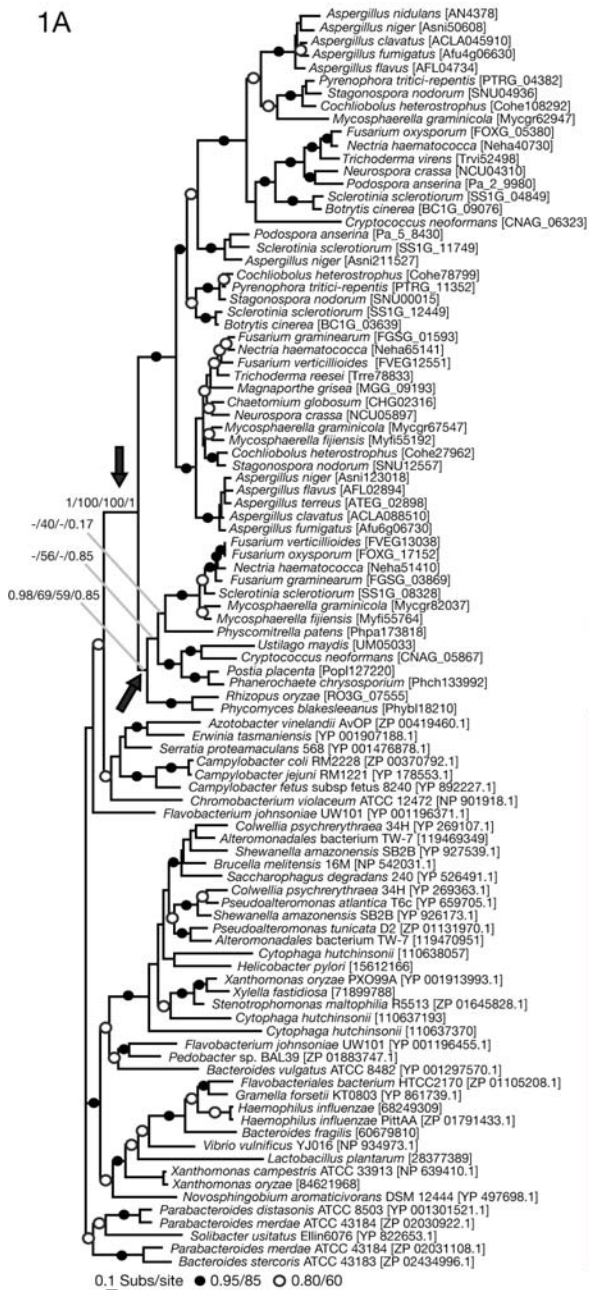

1B

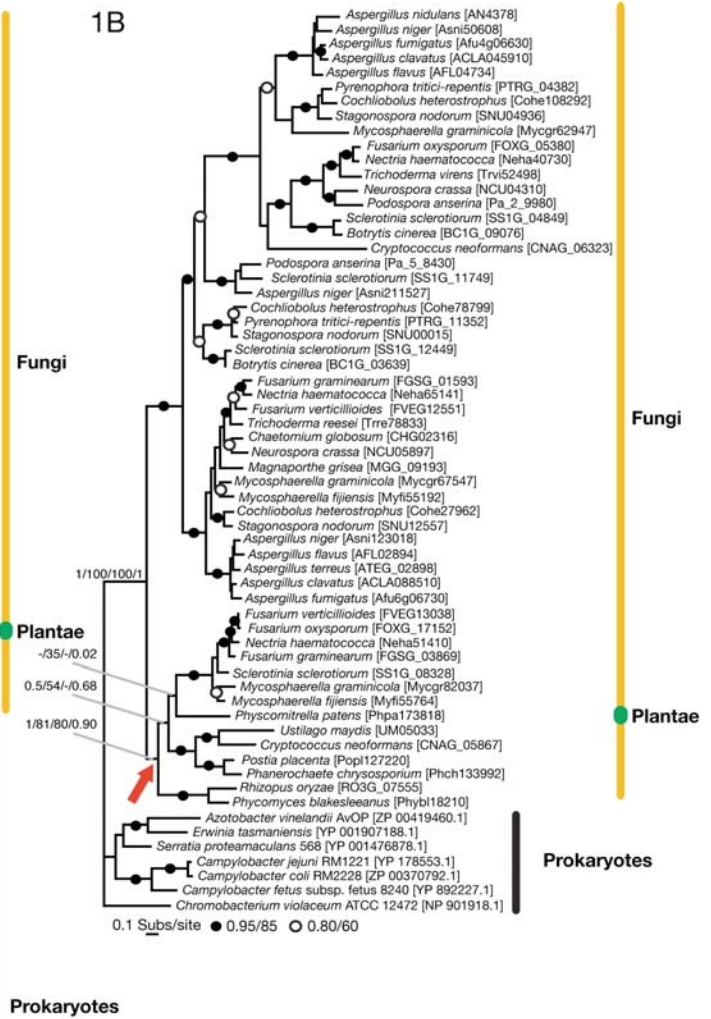

1C

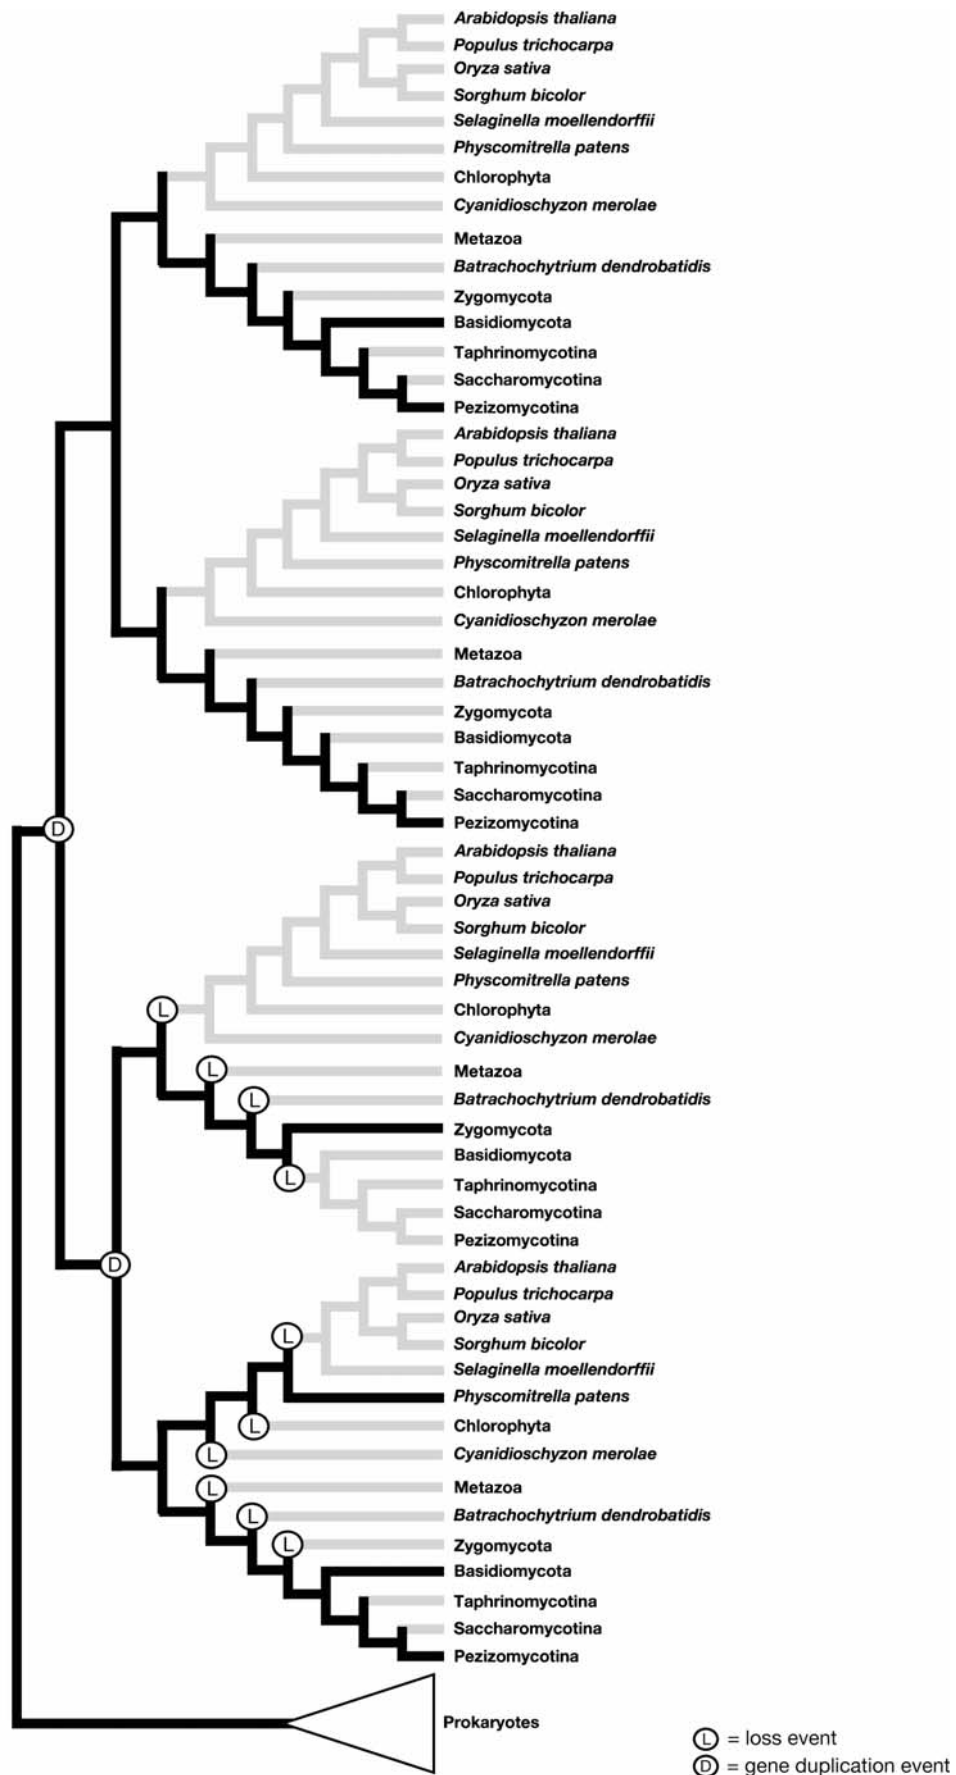

## REFERENCES

- Foster, P.G.** (2004). Modeling compositional heterogeneity. *Syst. Biol.* **53**, 485-495.
- Galtier, N., Gouy, M., and Gautier, C.** (1996). SEAVIEW and PHYLO\_WIN: two graphic tools for sequence alignment and molecular phylogeny. *Comput. Appl. Biosci.* **12**, 543-548.
- Guindon, S., and Gascuel, O.** (2003). A simple, fast, and accurate algorithm to estimate large phylogenies by maximum likelihood. *Syst. Biol.* **52**, 696-704.
- James, T.Y., Kauff, F., Schoch, C.L., Matheny, P.B., Hofstetter, V., Cox, C.J., Celio, G., Gueidan, C., Fraker, E., Miadlikowska, J., Lumbsch, H.T., Rauhut, A., Reeb, V., Arnold, A.E., Amtoft, A., Stajich, J.E., Hosaka, K., Sung, G.H., Johnson, D., O'Rourke, B., Crockett, M., Binder, M., Curtis, J.M., Slot, J.C., Wang, Z., Wilson, A.W., Schussler, A., Longcore, J.E., O'Donnell, K., Mozley-Standridge, S., Porter, D., Letcher, P.M., Powell, M.J., Taylor, J.W., White, M.M., Griffith, G.W., Davies, D.R., Humber, R.A., Morton, J.B., Sugiyama, J., Rossman, A.Y., Rogers, J.D., Pfister, D.H., Hewitt, D., Hansen, K., Hambleton, S., Shoemaker, R.A., Kohlmeyer, J., Volkman-Kohlmeyer, B., Spotts, R.A., Serdani, M., Crous, P.W., Hughes, K.W., Matsuura, K., Langer, E., Langer, G., Untereiner, W.A., Lucking, R., Budel, B., Geiser, D.M., Aptroot, A., Diederich, P., Schmitt, I., Schultz, M., Yahr, R., Hibbett, D.S., Lutzoni, F., McLaughlin, D.J., Spatafora, J.W., and Vilgalys, R.** (2006). Reconstructing the early evolution of Fungi using a six-gene phylogeny. *Nature* **443**, 818-822.
- Keane, T.M., Creevey, C.J., Naughton, T.J., Pentony, M.M., Naughton, T.J., and Mcinerney, J.O.** (2004). Assessment of methods for amino acid matrix selection and their use on empirical data shows that ad hoc assumptions for choice of matrix are not justified. *BMC Evol. Biol.* **6**, 29.
- Rodriguez-Ezpeleta, N., Brinkmann, H., Burey, S.C., Roure, B., Burger, G., Loffelhardt, W., Bohnert, H.J., Philippe, H., and Lang, B.F.** (2005). Monophyly of primary photosynthetic eukaryotes: green plants, red algae, and glaucophytes. *Curr. Biol.* **15**, 1325-1330.
- Ronquist, F., and Huelsenbeck, J.P.** (2003). MrBayes 3: Bayesian phylogenetic inference under mixed models. *Bioinformatics* **19**, 1572-1574.
- Shimodaira, H., and Hasegawa, M.** (2001). CONSEL:~for assessing the confidence of phylogenetic tree selection. *Bioinformatics* **17**, 1246-1247.
- Stamatakis, A.** (2006). RAxML-VI-HPC: maximum likelihood-based phylogenetic analyses with thousands of taxa and mixed models. *Bioinformatics* **22**, 2688-2690.
- Swofford, D.L.** (2002). PAUP\*. Phylogenetic Analysis Using Parsimony (\*and other methods), Version 4. (Sunderland, Massachusetts: Sinauer Associates).

**Supplemental Figure 2. Description of phylogenetic analysis, including the models used, sequence database accession numbers, alternative topology tests and assessment of hidden paralogy for the phylogeny shown on Figure 1B.**

**Figure 2.** Phylogenetic analyses of the putative zinc-binding alcohol dehydrogenase protein encoding gene family, demonstrating a putative horizontal gene transfer event from the ‘Plantae’ to the genome of the ‘chytrid’ fungus *Batrachochytrium dendrobatidis*. The ‘chytrid’ gene groups with moderate to strong support within a ‘Plantae’ phylogenetic group sister to the land plants, but rooted by the green algae. Such a branching relationship suggests an ancient gene transfer event from an early land plant lineage to the ‘chytrid’ fungi (black arrows mark the key branching relationships – **2A**). To test further the placement of *Batrachochytrium* gene within the ‘Plantae’ clade, we constrained a monophyletic branching order of the land plant and green algae clade to the exclusion of the ‘chytrid’ sequence and calculated alternative tree topologies using distance and parsimony methods (Swofford, 2002). For each alternative topology we re-calculated branch lengths using ML (Foster, 2004) and compared the resulting topologies with the MrBayes (Ronquist and Huelsenbeck, 2003) and PhyML (Guindon and Gascuel, 2003) topologies using the AU and SH test in Consel (Shimodaira and Hasegawa, 2001). We found that we could reject all six alternative topologies with fungal monophyly enforced at the 2.5% confidence level or lower, strongly suggesting that the ‘chytrid’ sequence branches within the ‘Plantae’ phylogenetic cluster. Taken together, this data is consistent with a Plantae to ‘chytrid’ gene transfer event.

The phylogeny was calculated from an alignment of 95 sequences and 207 amino acid characters. Modelgenerator (Keane et al., 2004) analysis demonstrated that a WAG substitution matrix, and a  $\Gamma$  distribution ( $\alpha = 1.57$ ), model of site rate heterogeneity were the most appropriate parameters for the data set. The phylogenetic trees shown were calculated using the fast maximum likelihood program phyML, with 1000 bootstrap replicates and SH analyses of each node (as described in the main text of the paper). To test further the topological result, we also ran a MrBayes analyses and 100 RAxML (Stamatakis, 2006) bootstrap replicates (as described in the main text of the paper). The key for each tree shows the short hand description of topology support values in the order Bayesian posterior probability / % bootstrap support (phyML + RAxML). Shaded discs represent nodes with ‘robust’ topology support values, while rings demonstrate nodes with ‘moderate’ topology support values (actual cut off values are given on the key). For key nodes the actual support values are shown in the order Bayesian Posterior Probability / 1000 phyML bootstraps / 100 RAxML bootstraps / phyML node-by-node SH test.

The species are labelled with an identifier code in square brackets, relating to the source of sequence data. These include GenBank protein accession codes and GI numbers, Broad Institute gene identifiers (in some cases curtailed for program compatibility reasons), and DOE JGI gene identifiers with a 4 letter species codes that we have added. The sources of all the genome sequences used in the pipeline analysis are listed in Supplemental Table 1. All additional non-genome project sequences are from GenBank. As genome sequence identifiers are continually updated, we have provided additional supporting material with all the sequences used as Seaview (Galtier et al., 1996) alignment files.

To compare the HGT scenarios with an alternative hypothesis of gene duplication events and gene loss (hidden paralogy) we drew a cladogram demonstrating gene duplication and gene loss events that would be necessary to generate the phylogenetic results shown without a HGT event (**2B**). These trees were based on an underlying eukaryotic species phylogeny. Because there is uncertainty about the relative branching order of many eukaryotic groups we restricted the underlying eukaryotic species phylogeny to identified species branching relationships among the, Plantae, the Fungi, and their sister group the metazoa (Rodriguez-Ezpeleta et al., 2005; James et al., 2006). As such this analyses underestimates the number of gene duplication and gene loss events required for the alternative hypothesis of hidden paralogy. Only gene duplication (D) and gene loss (L) events required to invoke the hidden paralogy are marked (all other loss events are not scored). For hidden paralogy to explain the branching of the fungi within the Plantae clade, given the taxon sampling available for this analysis, a minimum of 5 independent gene loss events and 1 gene duplication events are required. This compares to the scenario of a single Plantae-to-fungi HGT event.

2A

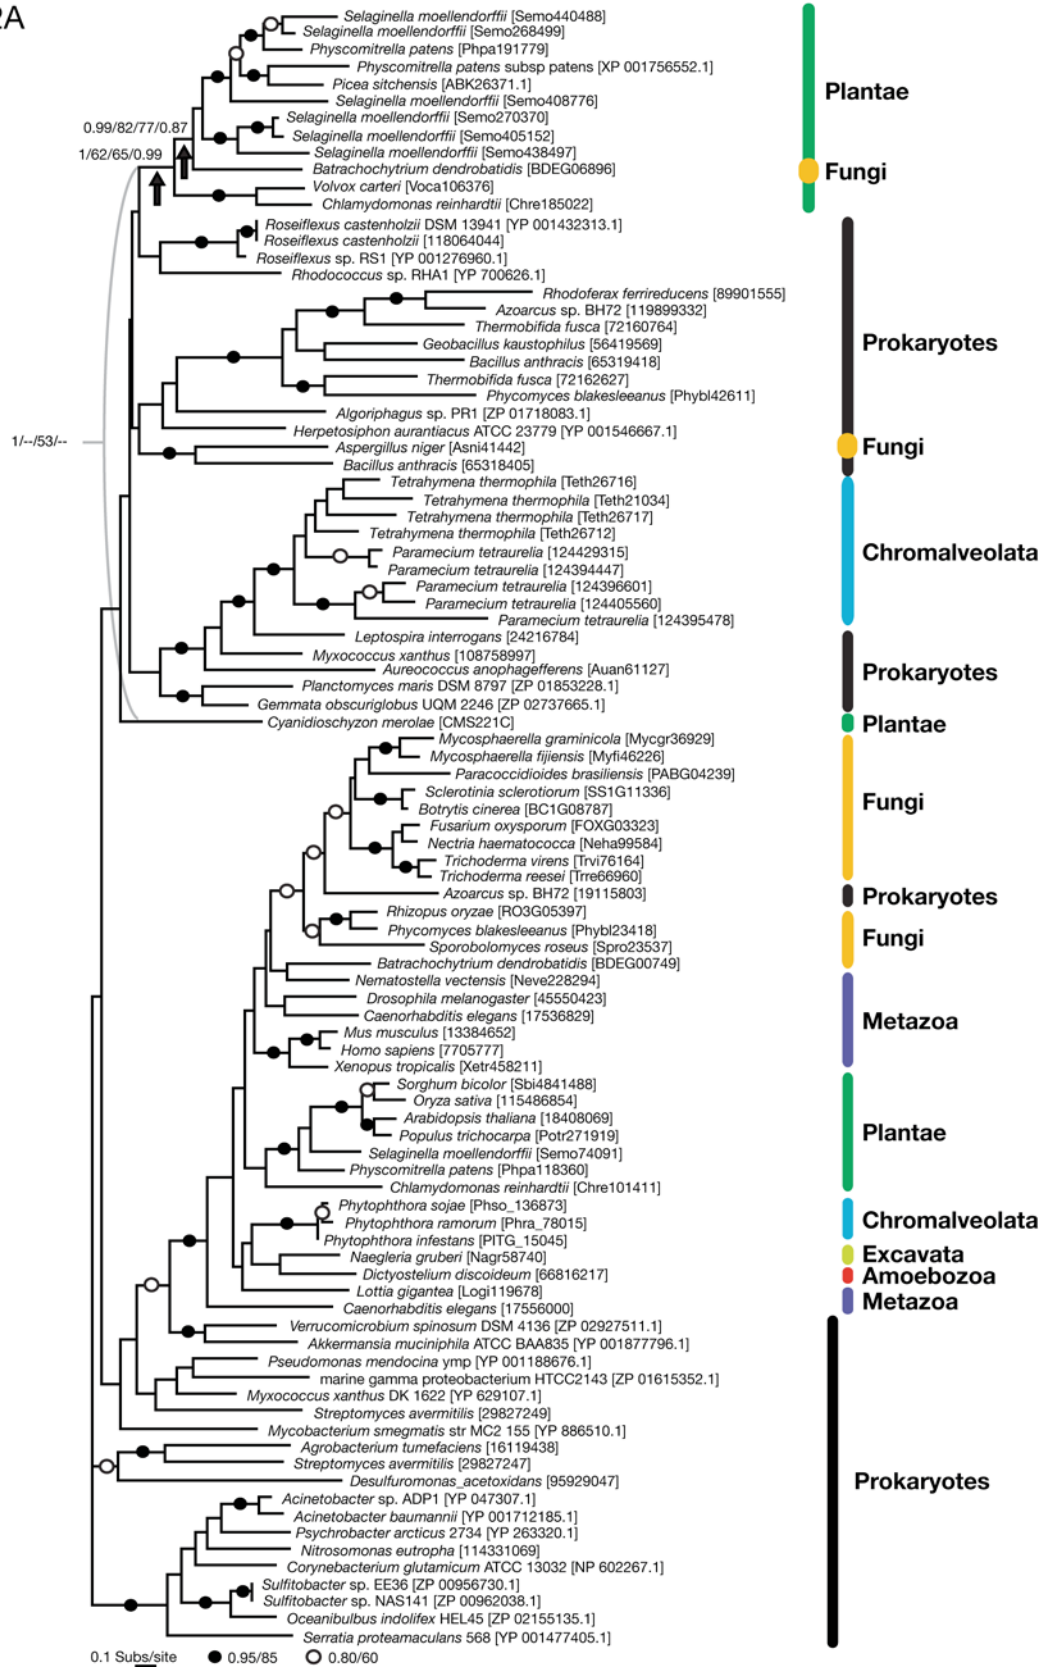



2B

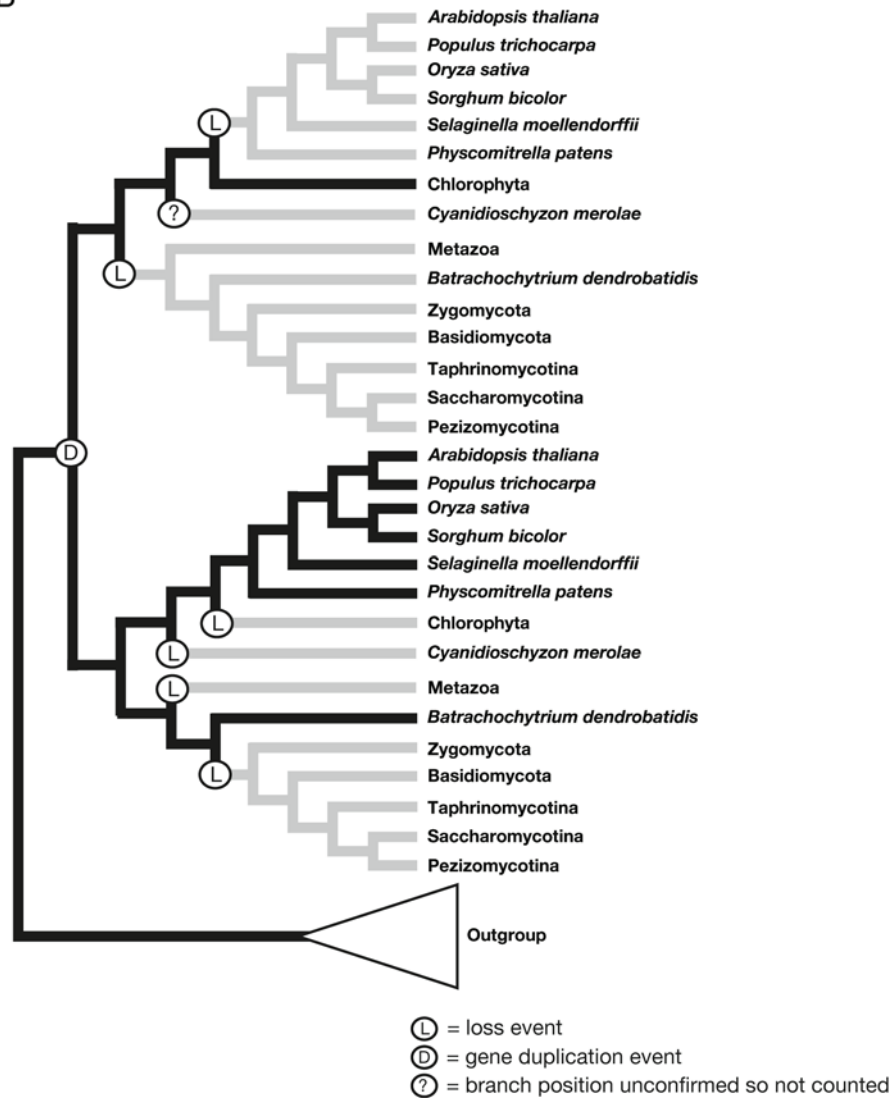

## REFERENCES

- Foster, P.G. (2004). Modeling compositional heterogeneity. *Syst. Biol.* **53**, 485-495.
- Galtier, N., Gouy, M., and Gautier, C. (1996). SEAVIEW and PHYLO\_WIN: two graphic tools for sequence alignment and molecular phylogeny. *Comput. Appl. Biosci.* **12**, 543-548.
- Guindon, S., and Gascuel, O. (2003). A simple, fast, and accurate algorithm to estimate large phylogenies by maximum likelihood. *Syst. Biol.* **52**, 696-704.
- James, T.Y., Kauff, F., Schoch, C.L., Matheny, P.B., Hofstetter, V., Cox, C.J., Celio, G., Gueidan, C., Fraker, E., Miadlikowska, J., Lumbsch, H.T., Rauhut, A., Reeb, V., Arnold, A.E., Amtoft, A., Stajich, J.E., Hosaka, K., Sung, G.H., Johnson, D., O'Rourke, B., Crockett, M., Binder, M., Curtis, J.M., Slot, J.C., Wang, Z., Wilson, A.W., Schussler, A., Longcore, J.E., O'Donnell, K., Mozley-Standridge, S., Porter, D., Letcher, P.M., Powell, M.J., Taylor, J.W., White, M.M., Griffith, G.W., Davies, D.R., Humber, R.A., Morton, J.B., Sugiyama, J., Rossman, A.Y., Rogers, J.D., Pfister, D.H., Hewitt, D., Hansen, K., Hambleton, S., Shoemaker, R.A., Kohlmeyer, J., Volkmann-

- Kohlmeyer, B., Spotts, R.A., Serdani, M., Crous, P.W., Hughes, K.W., Matsuura, K., Langer, E., Langer, G., Untereiner, W.A., Lucking, R., Budel, B., Geiser, D.M., Aptroot, A., Diederich, P., Schmitt, I., Schultz, M., Yahr, R., Hibbett, D.S., Lutzoni, F., McLaughlin, D.J., Spatafora, J.W., and Vilgalys, R.** (2006). Reconstructing the early evolution of Fungi using a six-gene phylogeny. *Nature* **443**, 818-822.
- Keane, T.M., Creevey, C.J., Naughton, T.J., Pentony, M.M., Naughton, T.J., and Mcinerney, J.O.** (2004). Assessment of methods for amino acid matrix selection and their use on empirical data shows that ad hoc assumptions for choice of matrix are not justified. *BMC Evol. Biol.* **6**, 29.
- Rodriguez-Ezpeleta, N., Brinkmann, H., Burey, S.C., Roure, B., Burger, G., Loffelhardt, W., Bohnert, H.J., Philippe, H., and Lang, B.F.** (2005). Monophyly of primary photosynthetic eukaryotes: green plants, red algae, and glaucophytes. *Curr. Biol.* **15**, 1325-1330.
- Ronquist, F., and Huelsenbeck, J.P.** (2003). MrBayes 3: Bayesian phylogenetic inference under mixed models. *Bioinformatics* **19**, 1572-1574.
- Shimodaira, H., and Hasegawa, M.** (2001). CONSEL:~for assessing the confidence of phylogenetic tree selection. *Bioinformatics* **17**, 1246-1247.
- Stamatakis, A.** (2006). RAxML-VI-HPC: maximum likelihood-based phylogenetic analyses with thousands of taxa and mixed models. *Bioinformatics* **22**, 2688-2690.
- Swofford, D.L.** (2002). PAUP\*. Phylogenetic Analysis Using Parsimony (\*and other methods), Version 4. (Sunderland, Massachusetts: Sinauer Associates).

**Supplemental Figure 3. Description of phylogenetic analysis, including the models used, sequence database accession numbers, alternative topology tests and assessment of hidden paralogy for the phylogeny shown on Figure 1C.**

**Figure 3.** Phylogenetic analyses of a putative membrane transporter protein encoding gene family, demonstrating a putative horizontal gene transfer event from the fungi to the lycophyte *Selaginella* genome. The phyML and RAxML demonstrated slightly different topologies, shown by grey lines on Figure 3A, however both analyses placed the *Selaginella* clade with 71 and 64% bootstrap support respectively (marked by a black arrow) within the fungal clade. This combined with the strong bootstrap support (100/96% bootstrap support – marked by a black arrow - 3A) for the grouping of *Selaginella* with the fungi, separately from all other plants suggests support for a putative fungi-to-plant horizontal gene transfer. To specifically test the phylogenetic support for the branching of the *Selaginella* gene within the fungal clade, we constrained a monophyletic branching order for the fungal clade and calculated alternative tree topologies using distance and parsimony methods (Swofford, 2002). For each alternative topology we re-calculated branch lengths using ML (Foster, 2004) and compared the resulting topologies with the MrBayes (Ronquist and Huelsenbeck, 2003) and PhyML (Guindon and Gascuel, 2003) topologies using the AU and SH test in Consel (Shimodaira and Hasegawa, 2001). We found that we could reject two of the alternative topologies at the 2.4% significance level using AU and SH test. However, one alternative topology that placed the *Selaginella* sequence with the prokaryotes could not be rejected at the 5% confidence level using the AU test (AU score = 0.168). However, this alternative topology was strongly rejected by the SH test at the 0.1% confidence level. This combined with the strong bootstrap support for placement of the *Selaginella* sequence with the fungi (100/96%) strongly suggests that the *Selaginella* sequence branches with the ascomycete clade most likely as a product of a fungi-to-plant horizontal gene transfer.

The phylogeny was calculated from an alignment of 40 sequences and 354 amino acid characters. Modelgenerator (Keane et al., 2004) analysis demonstrated that a WAG substitution matrix and a  $\Gamma$  distribution ( $\alpha = 2.22$ ) model of site rate heterogeneity were the most appropriate parameters for the data set. The phylogenetic trees shown were calculated using the fast maximum likelihood program phyML, with 1000 bootstrap replicates and SH analyses of each node (as described in the main text of the paper). To test further the topological result, we also ran a MrBayes analyses and 100 RAxML (Stamatakis, 2006) bootstrap replicates (as described in the main text of the paper). The key for each tree shows the short hand description of topology support values in the

order Bayesian posterior probability / % bootstrap support (phyML + RAxML). Shaded discs represent nodes with 'robust' topology support values, while rings demonstrate nodes with 'moderate' topology support values (actual cut off values are given on the key). For key nodes the actual support values are shown in the order Bayesian Posterior Probability / 1000 phyML bootstraps / 100 RAxML bootstraps / phyML node-by-node SH test.

The species are labelled with an identifier code in square brackets, relating to the source of sequence data. These include GenBank protein accession codes and GI numbers, Broad Institute gene identifiers (in some cases curtailed for program compatibility reasons), and DOE JGI gene identifiers with a 4 letter species codes that we have added. The source of all the genome sequences used in the pipeline analysis is listed in Supplemental Table 1. All additional non-genome project sequences are from GenBank. As genome sequence identifiers are continually updated we have provided additional supporting material with all the sequences used as Seaview (Galtier et al., 1996) alignment files.

To compare the HGT scenarios with an alternative hypothesis of gene duplication and gene loss (hidden paralogy) we drew a cladogram demonstrating gene duplication and gene loss events that would be necessary to generate the phylogenetic results shown without a HGT event (**3B**). These trees were based on an underlying eukaryotic species phylogeny. Because there is uncertainty about the relative branching order of many eukaryotic groups we restricted the underlying eukaryotic species phylogeny to strongly supported branching relationships among the Plantae, the Fungi, and their sister group the metazoa (Rodriguez-Ezpeleta et al., 2005; James et al., 2006). As such this analyses underestimates the number of gene duplication and gene loss events required for the alternative hypothesis of hidden paralogy. Only duplication (D) and loss (L) events required to invoke the hidden paralogy are marked (all other loss events are not scored). For hidden paralogy to explain the branching of the plant within the fungal clade, given the taxon sampling available for this analysis, a minimum of 17 independent gene loss events and 2 gene duplication events are required. This compares to the scenario of a single fungi-to-plant HGT event.

3A

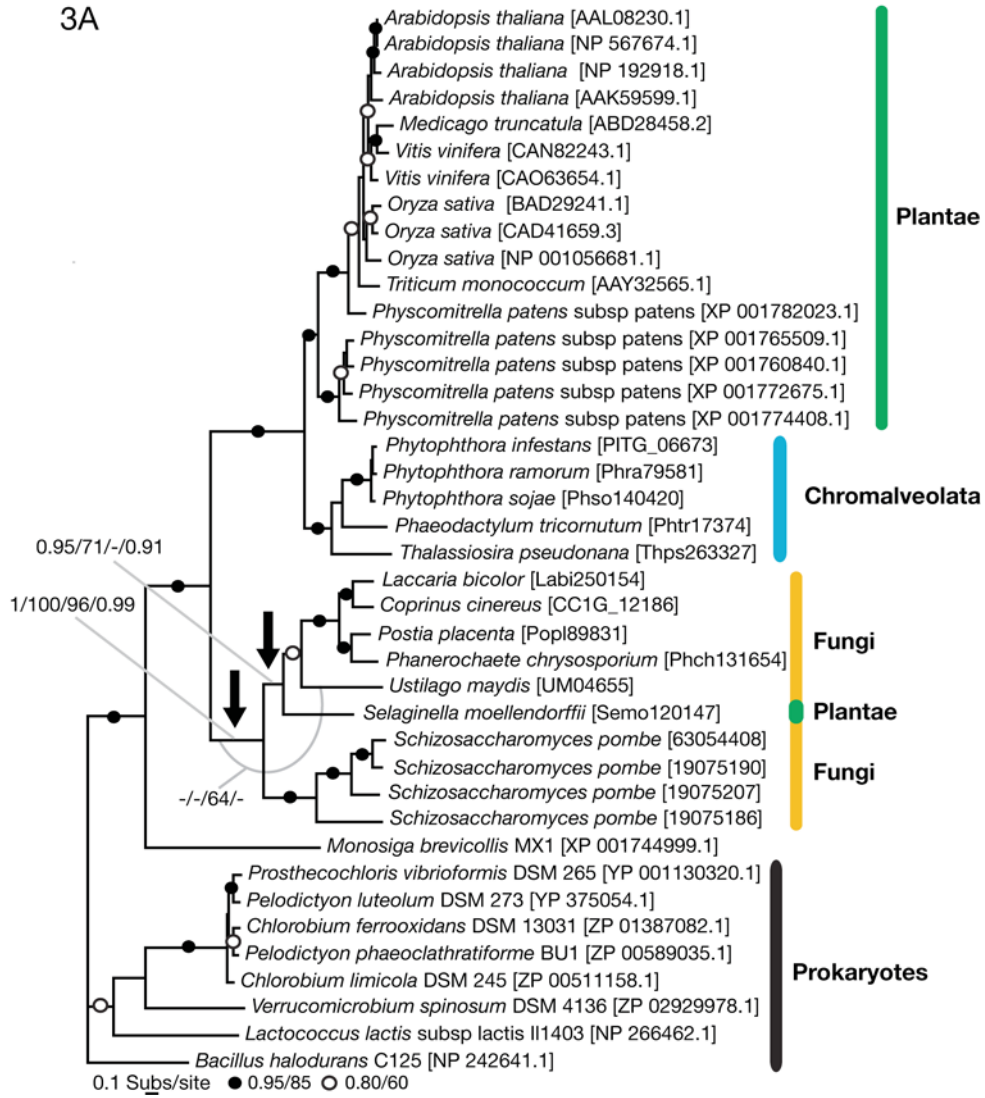

3B

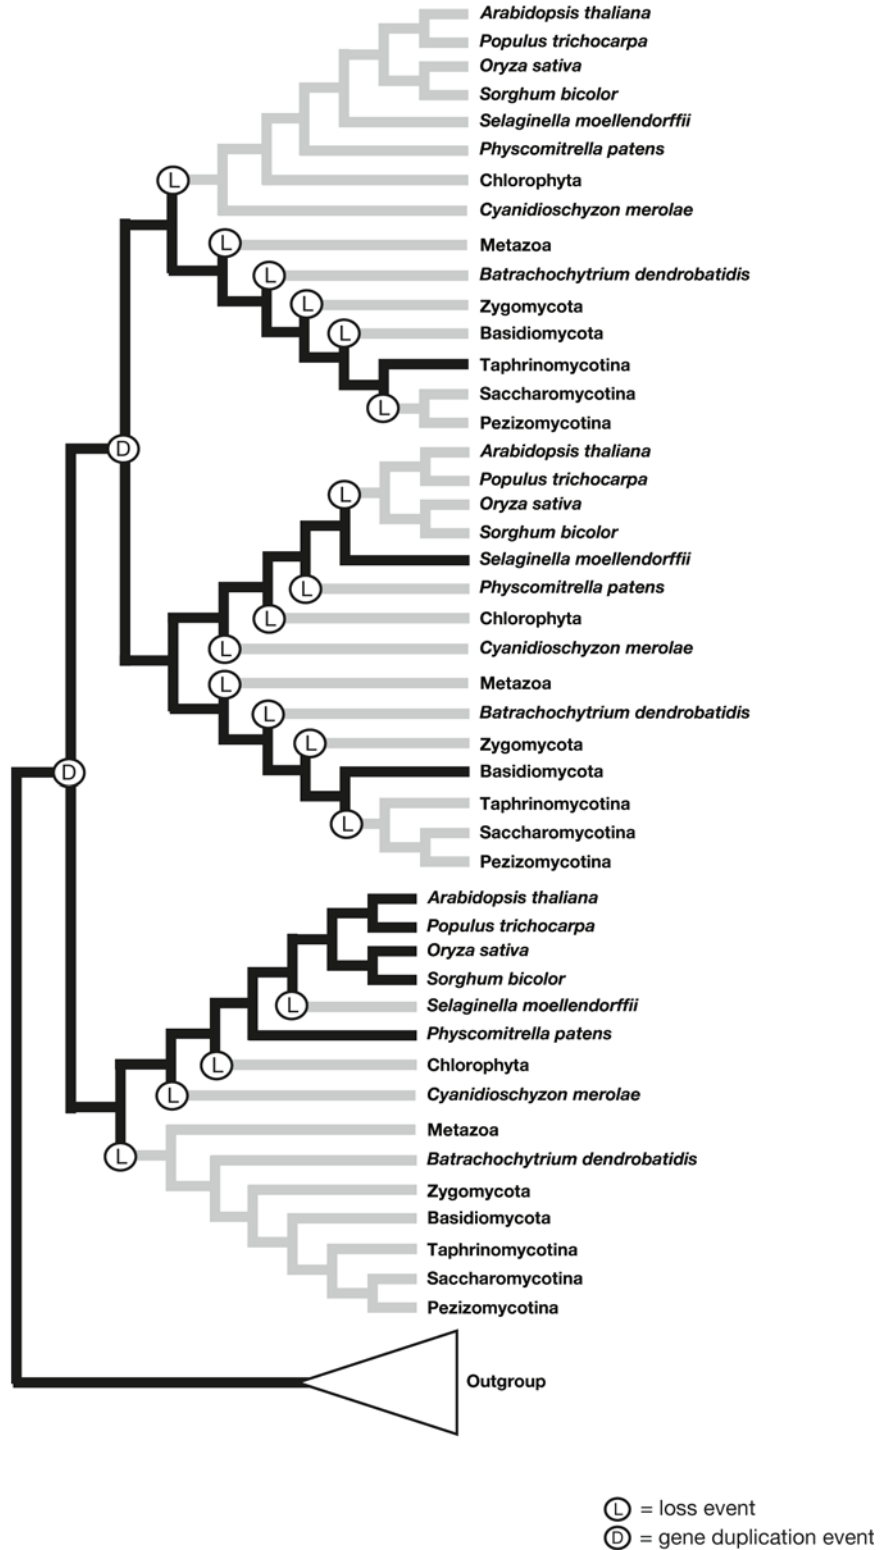

REFERENCES

Foster, P.G. (2004). Modeling compositional heterogeneity. Syst. Biol. 53, 485-495.

- Galtier, N., Gouy, M., and Gautier, C.** (1996). SEAVIEW and PHYLO\_WIN: two graphic tools for sequence alignment and molecular phylogeny. *Comput. Appl. Biosci.* **12**, 543-548.
- Guindon, S., and Gascuel, O.** (2003). A simple, fast, and accurate algorithm to estimate large phylogenies by maximum likelihood. *Syst. Biol.* **52**, 696-704.
- James, T.Y., Kauff, F., Schoch, C.L., Matheny, P.B., Hofstetter, V., Cox, C.J., Celio, G., Gueidan, C., Fraker, E., Miadlikowska, J., Lumbsch, H.T., Rauhut, A., Reeb, V., Arnold, A.E., Amtoft, A., Stajich, J.E., Hosaka, K., Sung, G.H., Johnson, D., O'Rourke, B., Crockett, M., Binder, M., Curtis, J.M., Slot, J.C., Wang, Z., Wilson, A.W., Schussler, A., Longcore, J.E., O'Donnell, K., Mozley-Standridge, S., Porter, D., Letcher, P.M., Powell, M.J., Taylor, J.W., White, M.M., Griffith, G.W., Davies, D.R., Humber, R.A., Morton, J.B., Sugiyama, J., Rossman, A.Y., Rogers, J.D., Pfister, D.H., Hewitt, D., Hansen, K., Hambleton, S., Shoemaker, R.A., Kohlmeyer, J., Volkmann-Kohlmeyer, B., Spotts, R.A., Serdani, M., Crous, P.W., Hughes, K.W., Matsuura, K., Langer, E., Langer, G., Untereiner, W.A., Lucking, R., Budel, B., Geiser, D.M., Aptroot, A., Diederich, P., Schmitt, I., Schultz, M., Yahr, R., Hibbett, D.S., Lutzoni, F., McLaughlin, D.J., Spatafora, J.W., and Vilgalys, R.** (2006). Reconstructing the early evolution of Fungi using a six-gene phylogeny. *Nature* **443**, 818-822.
- Keane, T.M., Creevey, C.J., Naughton, T.J., Pentony, M.M., Naughton, T.J., and Mcinerney, J.O.** (2004). Assessment of methods for amino acid matrix selection and their use on empirical data shows that ad hoc assumptions for choice of matrix are not justified. *BMC Evol. Biol.* **6**, 29.
- Rodriguez-Ezpeleta, N., Brinkmann, H., Burey, S.C., Roure, B., Burger, G., Loffelhardt, W., Bohnert, H.J., Philippe, H., and Lang, B.F.** (2005). Monophyly of primary photosynthetic eukaryotes: green plants, red algae, and glaucophytes. *Curr. Biol.* **15**, 1325-1330.
- Ronquist, F., and Huelsenbeck, J.P.** (2003). MrBayes 3: Bayesian phylogenetic inference under mixed models. *Bioinformatics* **19**, 1572-1574.
- Shimodaira, H., and Hasegawa, M.** (2001). CONSEL:~for assessing the confidence of phylogenetic tree selection. *Bioinformatics* **17**, 1246-1247.
- Stamatakis, A.** (2006). RAxML-VI-HPC: maximum likelihood-based phylogenetic analyses with thousands of taxa and mixed models. *Bioinformatics* **22**, 2688-2690.
- Swofford, D.L.** (2002). PAUP\*. Phylogenetic Analysis Using Parsimony (\*and other methods), Version 4. (Sunderland, Massachusetts: Sinauer Associates).

**Supplemental Figure 4. Description of phylogenetic analysis, including the models used, sequence database accession numbers, alternative topology tests and assessment of hidden paralogy for the phylogeny shown on Figure 2.**

**Figure 4.** Phylogenetic analyses of the putative phospholipase / carboxylesterase family protein encoding gene family, demonstrating a putative horizontal gene transfer event from the ascomycete fungi to the lycophyte *Selaginella* genome (**4A**). Three *Selaginella* genes grouped within the ascomycetes by numerous weakly support nodes. However, two nodes were moderately supported in the phyML based bootstrap analyses (69 and 78% bootstrap support – marked by black arrows). Together, these phylogenetic relationships provide support for a putative fungi-to-plant horizontal gene transfer. The main analyses also suggested that the three *Selaginella* genes were not monophyletic. To test this possibility, we performed a second phylogenetic analyses (**4B**) removing distantly related sequences so that the resulting analyses focused on the ascomycete/*Selaginella* clade and adjusting the alignment character sampling. Phylogenetic analyses based upon this second alignment demonstrated weak support (56/57% bootstrap support) for a monophyletic *Selaginella* clade, suggesting that the putative gene transfer was a single fungal-to-plant transfer event. To specifically test the phylogenetic support for the three *Selaginella* sequences grouping within the ascomycete fungal clade- the key phylogenetic relationship for inferring a fungi-to-plant HGT event- we constrained a monophyletic branching order for the relevant ascomycete fungal clade and calculated alternative tree topologies using distance and parsimony methods (Swofford, 2002). For each alternative topology we re-calculated branch lengths using ML (Foster, 2004) and compared the resulting topologies with the MrBayes (Ronquist and Huelsenbeck, 2003) and PhyML (Guindon and Gascuel, 2003) topologies using the AU and SH test in Consel (Shimodaira and Hasegawa, 2001). We found that we could reject all five alternative topologies with fungal monophyly enforced at less than 0.1% confidence level. This strongly suggests that the *Selaginella* sequence branches within the ascomycete clade. Taken together this data suggests a fungi-to-plant horizontal gene transfer.

The phylogeny was calculated from an alignment of 122 sequences and 158 amino acid characters (**4A**) and an alignment of 62 sequences and 349 amino acid characters (**4B**). Modelgenerator (Keane et al., 2004) analysis demonstrated that a WAG substitution matrix,  $\Gamma$  distribution ( $\alpha = 1.52$ ), and a proportion of invariant sites ( $I = 0.03$ ), model of site rate heterogeneity were the most appropriate parameters for the **4A** data set. While a WAG substitution matrix,  $\Gamma$  distribution ( $\alpha = 2.302$ ), and a proportion of invariant sites ( $I = 0.025$ ) model of site rate



heterogeneity were the most appropriate parameters for the **4B** data set. The phylogenetic trees shown were calculated using the fast maximum likelihood program phyML, with 1000 bootstrap replicates and SH analyses of each node (as described in the main text of the paper). To test further the topological result, we also ran a MrBayes analyses and 100 RAxML (Stamatakis, 2006) bootstrap replicates (as described in the main text of the paper). The key for each tree shows the short hand description of topology support values in the order Bayesian posterior probability / % bootstrap support (phyML+ RAxML). Shaded discs represent nodes with ‘robust’ topology support values, while rings demonstrate nodes with ‘moderate’ topology support values (actual cut off values are given on the key). For key nodes the actual support values are shown in the order Bayesian Posterior Probability / 1000 phyML bootstraps / 100 RAxML bootstraps / phyML node-by-node SH test.

The species are labelled with an identifier code in square brackets, relating to the source of sequence data. These include GenBank protein accession codes and GI numbers, Broad Institute gene identifiers (in some cases curtailed for program compatibility reasons), and DOE JGI gene identifiers with a 4 letter species codes that we have added. The source of all the genome sequences used in the pipeline analysis is listed in Supplemental Table 1. All additional non-genome project sequences are from GenBank. As genome sequence identifiers are continually updated we have provided additional supporting material with all the sequences used as Seaview (Galtier et al., 1996) alignment files.

To compare the HGT scenarios with an alternative hypothesis of gene duplication events and gene losses (hidden paralogy) we drew a cladogram demonstrating gene duplication and gene loss events that would be necessary to generate the phylogenetic results shown without a HGT event (**4C**). These trees were based on an underlying eukaryotic species phylogeny. Because there is uncertainty about the relative branching order of many eukaryotic groups we restricted the underlying eukaryotic species phylogeny to strongly supported branching relationships among the Plantae, the Fungi, and their sister group the metazoa (Rodriguez-Ezpeleta et al., 2005; James et al., 2006). As such this analyses underestimates the number of gene duplication and gene loss events required for the alternative hypothesis of hidden paralogy. Only duplication (D) and loss (L) events required to invoke the hidden paralogy are marked (all other loss events are not scored). For hidden paralogy to explain the branching of the plant within the fungal clade, given the taxon sampling available for this analysis, a minimum of 17 independent gene loss events and 1 gene duplication events are required, in contrast to a single HGT.

4A

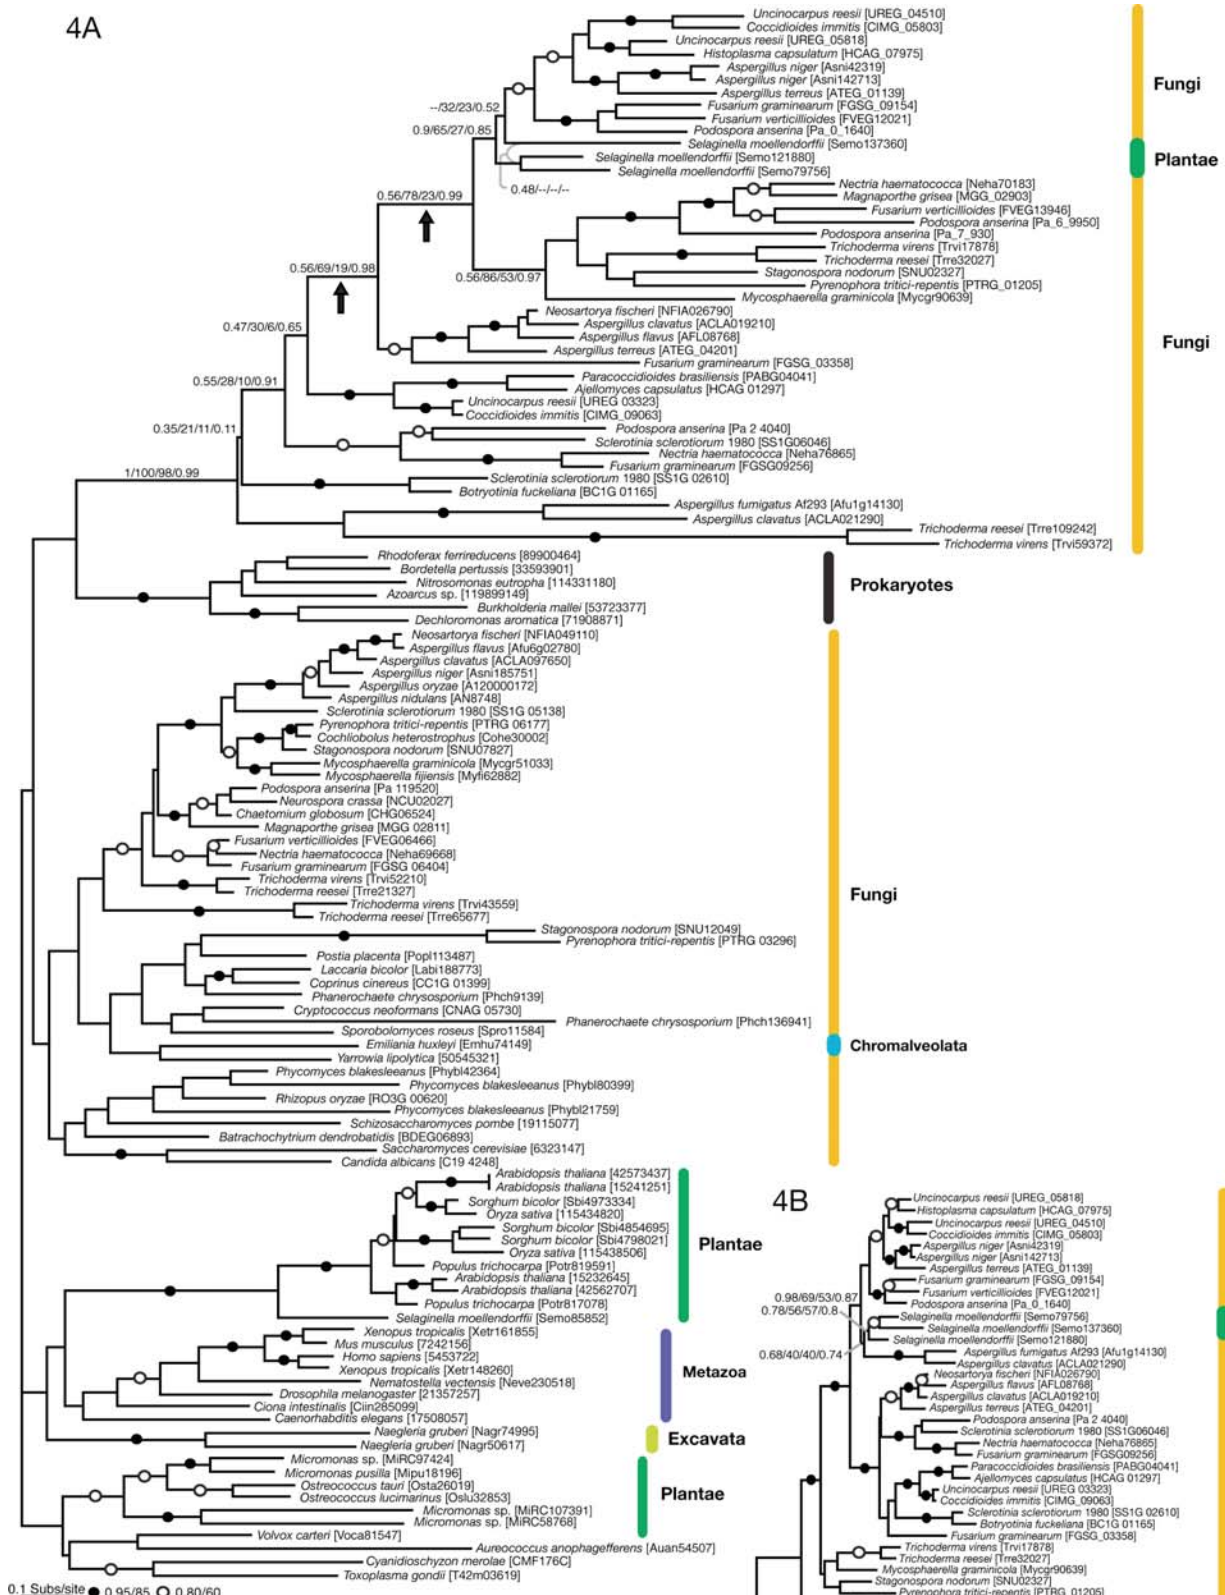

4B

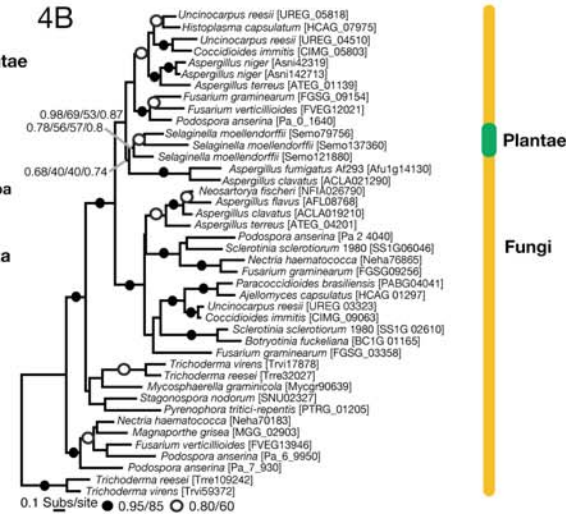

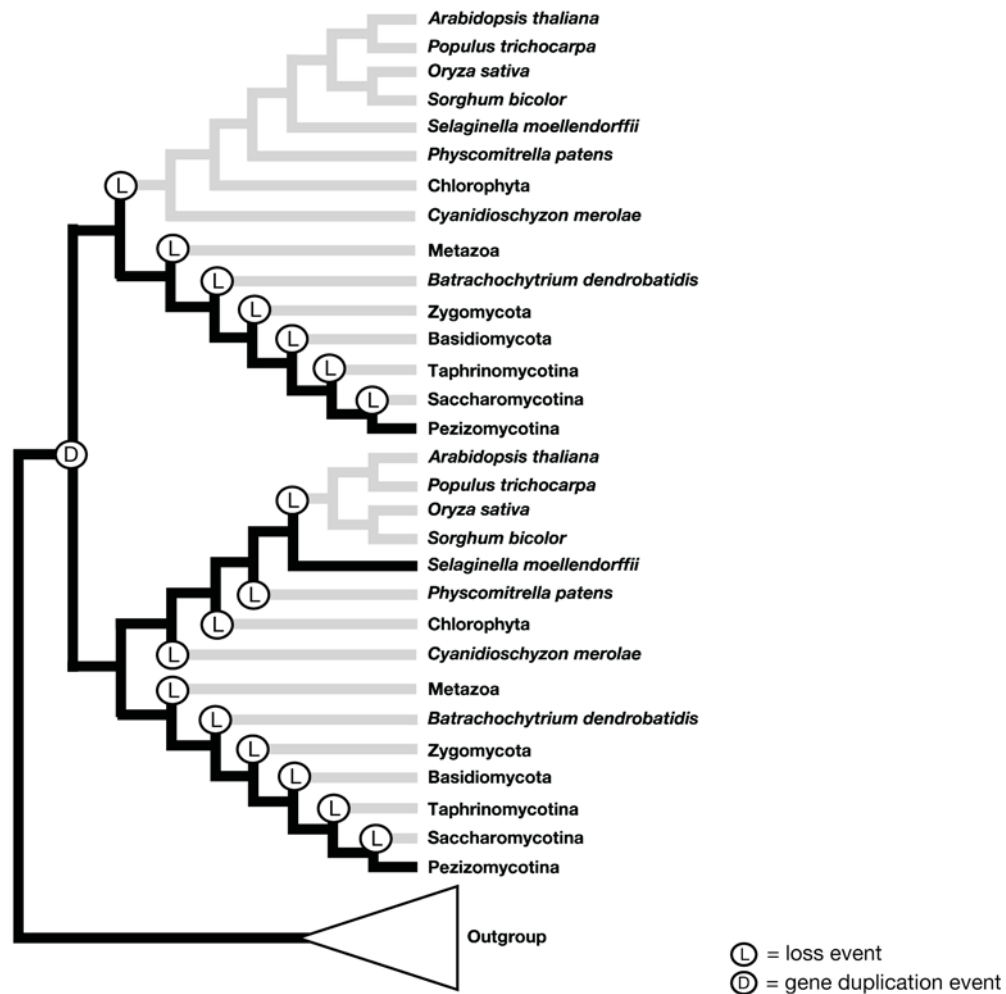

## REFERENCES

- Foster, P.G. (2004). Modeling compositional heterogeneity. *Syst. Biol.* **53**, 485-495.
- Galtier, N., Gouy, M., and Gautier, C. (1996). SEAVIEW and PHYLO\_WIN: two graphic tools for sequence alignment and molecular phylogeny. *Comput. Appl. Biosci.* **12**, 543-548.
- Guindon, S., and Gascuel, O. (2003). A simple, fast, and accurate algorithm to estimate large phylogenies by maximum likelihood. *Syst. Biol.* **52**, 696-704.
- James, T.Y., Kauff, F., Schoch, C.L., Matheny, P.B., Hofstetter, V., Cox, C.J., Celio, G., Gueidan, C., Fraker, E., Miadlikowska, J., Lumbsch, H.T., Rauhut, A., Reeb, V., Arnold, A.E., Amtoft, A., Stajich, J.E., Hosaka, K., Sung, G.H., Johnson, D., O'Rourke, B., Crockett, M., Binder, M., Curtis, J.M., Slot, J.C., Wang, Z., Wilson, A.W., Schussler, A., Longcore, J.E., O'Donnell, K., Mozley-Standridge, S., Porter, D., Letcher, P.M., Powell, M.J., Taylor, J.W., White, M.M., Griffith, G.W., Davies, D.R., Humber, R.A., Morton, J.B., Sugiyama, J., Rossman, A.Y., Rogers, J.D., Pfister, D.H., Hewitt, D., Hansen, K., Hambleton, S., Shoemaker, R.A., Kohlmeyer, J., Volkmann-Kohlmeyer, B., Spotts, R.A., Serdani, M., Crous, P.W., Hughes, K.W., Matsuura, K., Langer, E., Langer, G., Untereiner, W.A., Lucking, R., Budel, B., Geiser, D.M., Aptroot, A., Diederich, P., Schmitt, I., Schultz, M., Yahr, R., Hibbett, D.S., Lutzoni, F., McLaughlin, D.J., Spatafora, J.W., and Vilgalys, R. (2006). Reconstructing the early evolution of Fungi using a six-gene phylogeny. *Nature* **443**, 818-822.

- Keane, T.M., Creevey, C.J., Naughton, T.J., Pentony, M.M., Naughton, T.J., and Mcinerney, J.O.** (2004). Assessment of methods for amino acid matrix selection and their use on empirical data shows that ad hoc assumptions for choice of matrix are not justified. *BMC Evol. Biol.* **6**, 29.
- Rodriguez-Ezpeleta, N., Brinkmann, H., Burey, S.C., Roure, B., Burger, G., Loffelhardt, W., Bohnert, H.J., Philippe, H., and Lang, B.F.** (2005). Monophyly of primary photosynthetic eukaryotes: green plants, red algae, and glaucophytes. *Curr. Biol.* **15**, 1325-1330.
- Ronquist, F., and Huelsenbeck, J.P.** (2003). MrBayes 3: Bayesian phylogenetic inference under mixed models. *Bioinformatics* **19**, 1572-1574.
- Shimodaira, H., and Hasegawa, M.** (2001). CONSEL:~for assessing the confidence of phylogenetic tree selection. *Bioinformatics* **17**, 1246-1247.
- Stamatakis, A.** (2006). RAxML-VI-HPC: maximum likelihood-based phylogenetic analyses with thousands of taxa and mixed models. *Bioinformatics* **22**, 2688-2690.
- Swofford, D.L.** (2002). PAUP\*. Phylogenetic Analysis Using Parsimony (\*and other methods), Version 4. (Sunderland, Massachusetts: Sinauer Associates).

**Supplemental Figure 5. Description of phylogenetic analysis, including the models used, sequence database accession numbers, alternative topology tests and assessment of hidden paralogy for the phylogeny shown on Figure 3A.**

**Figure 5.** Phylogenetic analyses of the putative *iucA* / *iucC* protein encoding gene family, involved in siderophore biosynthesis, demonstrating a putative horizontal gene transfer event from the fungi to the lycophyte *Selaginella* genome (**5A**). This protein family, with the exception of the one plant genome and two *Dictyostelium* genomes, is restricted to a wide diversity of prokaryotes and the fungi, suggesting a prokaryote-to-fungi gene transfer. We also detected a putative homologue of this protein encoded by the plant *Selaginella moellendorffii* genome. This plant gene clustered strongly with the fungi (key node is marked with a black arrow) but with weak support for the plant gene grouping within the fungal phylogenetic group. Furthermore, the fungal tree topology showed a non-standard fungal branching order (Fitzpatrick et al., 2006; James et al., 2006) suggesting the support for the plant gene branching within the fungal phylogenetic cluster is weak. To attempt to resolve the branching position of the *Selaginella* gene within the fungi we performed a second phylogenetic analyses (**5B**) removing distantly related prokaryote sequences and adjusting the alignment character sampling. Phylogenetic analyses based upon this second alignment showed improved topology support values but still demonstrated a non-standard fungal branching order (Fitzpatrick et al., 2006; James et al., 2006). However, when the phylogenetic data is considered with the taxon distribution data, these analysis suggest the gene transfer of a prokaryote gene to a plant genome via a fungal genome.

The *Dictyostelium* genes branched separately from the plant/fungal clade with strong bootstrap support, branching among the prokaryotes, consistent with a separate origin of the *Dictyostelium* genes, possibly as a separate prokaryote-to-*Dictyostelium* HGT event as suggested by (Eichinger et al., 2005). Consequently, the presence of distantly related forms of this gene in *Dictyostelium* is not an important factor for the plant-fungi HGT. However, the alignment demonstrated that the *Dictyostelium* genes were highly divergent genes and formed long branches on the subsequent phylogenetic tree. The topology support values, although placed the *Dictyostelium* genes separate from the other eukaryotic genes with strong support, they did not demonstrate strong support for the monophyly of the *Dictyostelium* genes, indeed only the RAxML analysis recovered monophyly of the four *Dictyostelium* genes in the top scoring bootstrap consensus tree with 28% bootstrap support. Furthermore, the weak bootstrap support among this part of the tree topology makes it difficult to pinpoint a possible prokaryote donor lineage for the *Dictyostelium* genes.

The phylogeny was calculated from an alignment of 44 sequences and 218 amino acid characters (**5A**) and an alignment of 15 sequences and 262 amino acid characters (**5B**). Modelgenerator (Keane et al., 2004) analysis demonstrated that a RtREV substitution matrix,  $\Gamma$  distribution ( $\alpha = 45$ ), and a proportion of invariant sites ( $I = 0.08$ ) were the most appropriate parameters for the **5A** data set. While a RtREV substitution matrix, and a  $\Gamma$  distribution ( $\alpha = 2.24$ ), and a proportion of invariant sites ( $I = 0.1$ ) were the most appropriate parameters for the **5B** data set. The phylogenetic trees shown were calculated using the fast maximum likelihood program phyML (Guindon and Gascuel, 2003), with 1000 bootstrap replicates and SH analyses of each node (as described in the main text of the paper). To test further the topological result we also ran a MrBayes (Ronquist and Huelsenbeck, 2003) analyses and 100 RAxML (Stamatakis, 2006) bootstrap replicates (as described in the main text of the paper). The key for each tree shows the short hand description of topology support values in the order Bayesian posterior probability / % bootstrap support (phyML+ RAxML). Shaded discs represent nodes with ‘robust’ topology support values, while rings demonstrate nodes with ‘moderate’ topology support values (actual cut off values are given on the key). For key nodes the actual support values are shown in the order Bayesian Posterior Probability / 1000 phyML bootstraps / 100 RAxML bootstraps / phyML node-by-node SH test.

The species are labelled with an identifier code in square brackets, relating to the source of sequence data. These include GenBank protein accession codes and GI numbers, Broad Institute gene identifiers (in some cases curtailed for program compatibility reasons), and DOE JGI gene identifiers with a 4 letter species codes that we have added. The source of all the genome sequences used in the pipeline analysis is listed in Supplemental Table 1. All additional non-genome project sequences are from GenBank. As genome sequence identifiers are continually updated we have provided additional supporting material with all the sequences used as Seaview (Galtier et al., 1996) alignment files.

To compare the HGT scenarios with an alternative hypothesis of gene duplication events and gene loss (hidden paralogy) we drew a cladogram demonstrating gene duplication and gene loss events that would be necessary to generate the phylogenetic results shown without a HGT event (**5C**). These trees were based on an underlying eukaryotic species phylogeny. However, because the gene phylogeny showed a non-standard fungal branching order we assumed the gene family included an ancestry of two gene duplications generating three paralogue families, but only counted the duplication and loss relevant to the HGT hypothesis. Because there is uncertainty about the relative branching order of many eukaryotic groups we restricted the underlying eukaryotic species

phylogeny to strongly supported branching relationships among the Plantae, the Fungi, and their sister group the metazoa (Rodriguez-Ezpeleta et al., 2005; James et al., 2006). As such this analyses underestimates the number of gene duplication and gene loss events required for the alternative hypothesis of hidden paralogy. Only gene duplication (D) and gene loss (L) events required to invoke the hidden paralogy are marked (all other loss events are not scored). For hidden paralogy to explain the branching of the plant within the fungal clade, given the taxon sampling available for this analysis, a minimum of 10 independent gene loss events and 1 gene duplication events are required. This compares to the scenario of a single fungi-to-plant HGT event.

5A

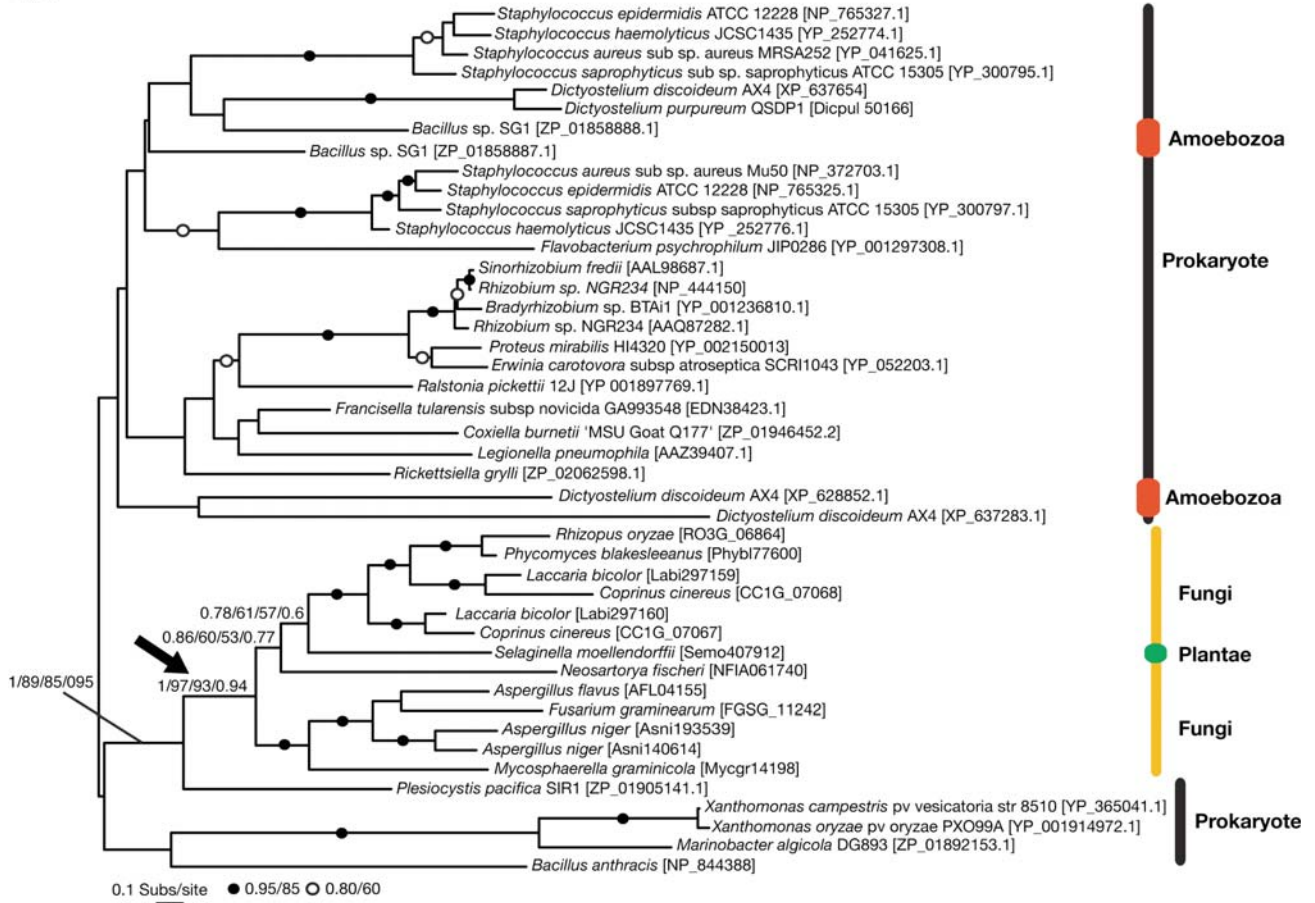

5B

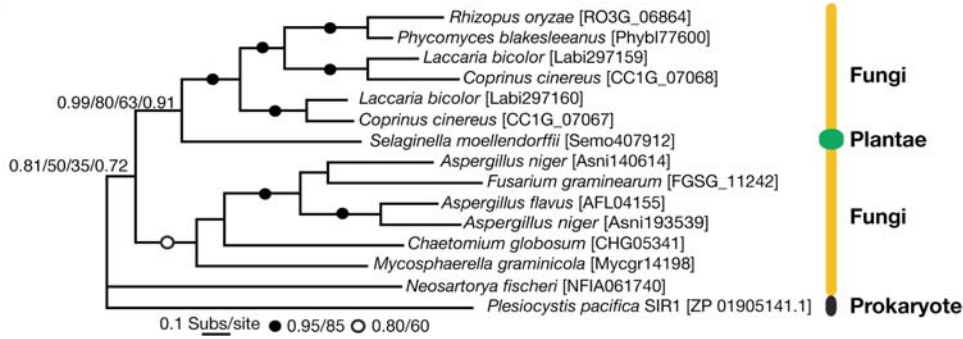



5C

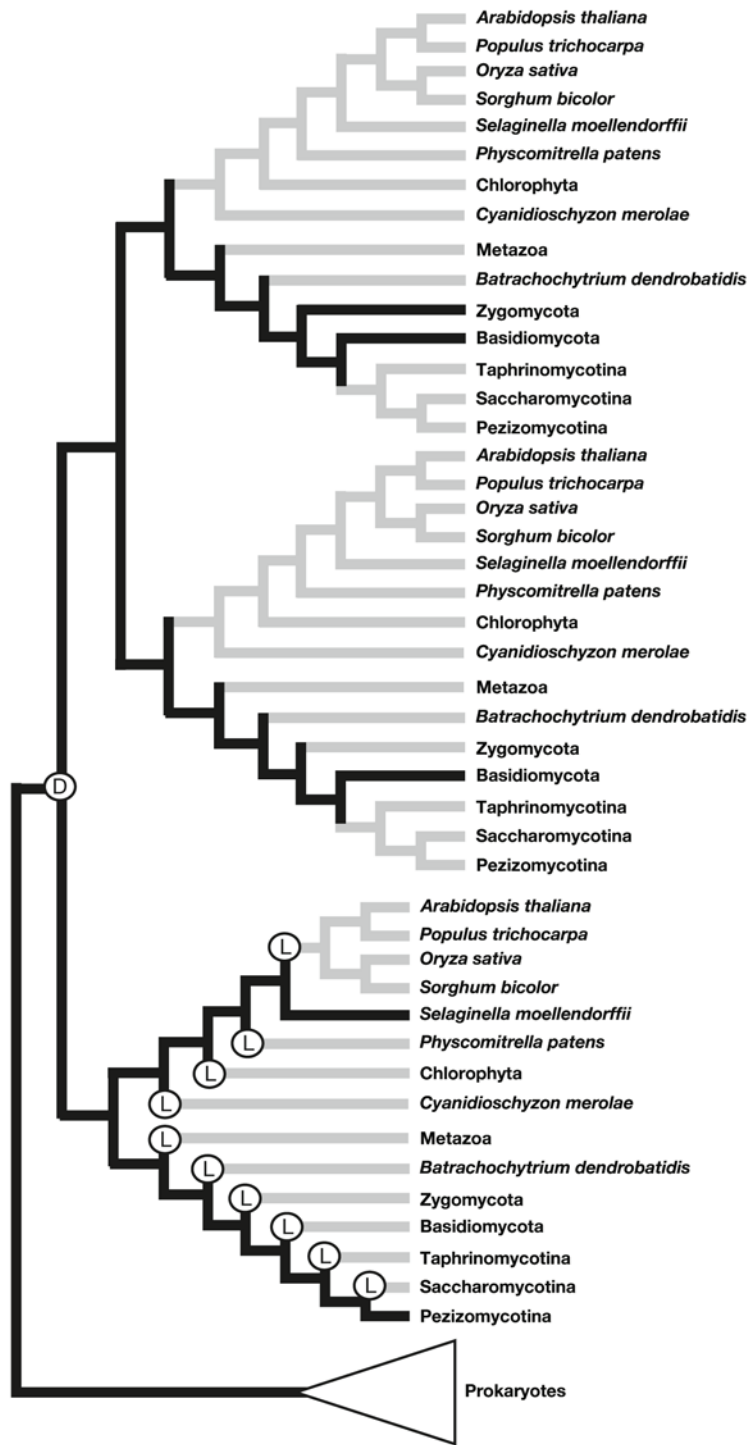

Ⓛ = loss event  
 Ⓧ = gene duplication event

## REFERENCES

- Eichinger, L., Pachebat, J.A., Glockner, G., Rajandream, M.A., Suggang, R., Berriman, M., Song, J., Olsen, R., Szafranski, K., Xu, Q., Tunggal, B., Kummerfeld, S., Madera, M., Konfortov, B.A., Rivero, F., Bankier, A.T., Lehmann, R., Hamlin, N., Davies, R., Gaudet, P., Fey, P., Pilcher, K., Chen, G., Saunders, D., Sodergren, E., Davis, P., Kerhornou, A., Nie, X., Hall, N., Anjard, C., Hemphill, L., Bason, N., Farbrother, P., Desany, B., Just, E., Morio, T., Rost, R., Churcher, C., Cooper, J., Haydock, S., van Driessche, N., Cronin, A., Goodhead, I., Muzny, D., Mourier, T., Pain, A., Lu, M., Harper, D., Lindsay, R., Hauser, H., James, K., Quiles, M., Madan Babu, M., Saito, T., Buchrieser, C., Wardroper, A., Felder, M., Thangavelu, M., Johnson, D., Knights, A., Louseged, H., Mungall, K., Oliver, K., Price, C., Quail, M.A., Urushihara, H., Hernandez, J., Rabinowitsch, E., Steffen, D., Sanders, M., Ma, J., Kohara, Y., Sharp, S., Simmonds, M., Spiegler, S., Tivey, A., Sugano, S., White, B., Walker, D., Woodward, J., Winckler, T., Tanaka, Y., Shaulsky, G., Schleicher, M., Weinstock, G., Rosenthal, A., Cox, E.C., Chisholm, R.L., Gibbs, R., Loomis, W.F., Platzer, M., Kay, R.R., Williams, J., Dear, P.H., Noegel, A.A., Barrell, B., and Kuspa, A. (2005). The genome of the social amoeba *Dictyostelium discoideum*. *Nature* **435**, 43-57.
- Fitzpatrick, D.A., Logue, M.E., Stajich, J.E., and Butler, G. (2006). A fungal phylogeny based on 42 complete genomes derived from supertree and combined gene analysis. *BMC Evol. Biol.* **6**.
- Galtier, N., Gouy, M., and Gautier, C. (1996). SEAVIEW and PHYLO\_WIN: two graphic tools for sequence alignment and molecular phylogeny. *Comput. Appl. Biosci.* **12**, 543-548.
- Guindon, S., and Gascuel, O. (2003). A simple, fast, and accurate algorithm to estimate large phylogenies by maximum likelihood. *Syst. Biol.* **52**, 696-704.
- James, T.Y., Kauff, F., Schoch, C.L., Matheny, P.B., Hofstetter, V., Cox, C.J., Celio, G., Gueidan, C., Fraker, E., Miadlikowska, J., Lumbsch, H.T., Rauhut, A., Reeb, V., Arnold, A.E., Amtoft, A., Stajich, J.E., Hosaka, K., Sung, G.H., Johnson, D., O'Rourke, B., Crockett, M., Binder, M., Curtis, J.M., Slot, J.C., Wang, Z., Wilson, A.W., Schussler, A., Longcore, J.E., O'Donnell, K., Mozley-Standridge, S., Porter, D., Letcher, P.M., Powell, M.J., Taylor, J.W., White, M.M., Griffith, G.W., Davies, D.R., Humber, R.A., Morton, J.B., Sugiyama, J., Rossman, A.Y., Rogers, J.D., Pfister, D.H., Hewitt, D., Hansen, K., Hambleton, S., Shoemaker, R.A., Kohlmeyer, J., Volkman-Kohlmeier, B., Spotts, R.A., Serdani, M., Crous, P.W., Hughes, K.W., Matsuura, K., Langer, E., Langer, G., Untereiner, W.A., Lucking, R., Budel, B., Geiser, D.M., Aptroot, A., Diederich, P., Schmitt, I., Schultz, M., Yahr, R., Hibbett, D.S., Lutzoni, F., McLaughlin, D.J., Spatafora, J.W., and Vilgalys, R. (2006). Reconstructing the early evolution of Fungi using a six-gene phylogeny. *Nature* **443**, 818-822.
- Keane, T.M., Creevey, C.J., Naughton, T.J., Pentony, M.M., Naughton, T.J., and Mcinerney, J.O. (2004). Assessment of methods for amino acid matrix selection and their use on empirical data shows that ad hoc assumptions for choice of matrix are not justified. *BMC Evol. Biol.* **6**, 29.
- Rodriguez-Ezpeleta, N., Brinkmann, H., Burey, S.C., Roure, B., Burger, G., Loffelhardt, W., Bohnert, H.J., Philippe, H., and Lang, B.F. (2005). Monophyly of primary photosynthetic eukaryotes: green plants, red algae, and glaucophytes. *Curr. Biol.* **15**, 1325-1330.
- Ronquist, F., and Huelsenbeck, J.P. (2003). MrBayes 3: Bayesian phylogenetic inference under mixed models. *Bioinformatics* **19**, 1572-1574.

**Stamatakis, A.** (2006). RAxML-VI-HPC: maximum likelihood-based phylogenetic analyses with thousands of taxa and mixed models. *Bioinformatics* **22**, 2688-2690.

**Supplemental Figure 6. Description of phylogenetic analysis, including the models used, sequence database accession numbers, alternative topology tests and assessment of hidden paralogy for the phylogeny shown on Figure 3B.**

**Figure 6.** Phylogeny of an unknown / conserved hypothetical protein family demonstrating a candidate fungal-to-plant gene transfer (**6A**). This protein family, with the exception of the one plant genome, is restricted to a wide diversity of prokaryotes and the ascomycete fungi suggesting a prokaryote-to-fungi gene transfer. We also detected a putative homologue of this protein encoded by the *Physcomitrella patens* genome. This plant gene clustered with the fungi with weak support for the plant gene grouping within the fungi phylogenetic group. To attempt to resolve the branching position of the *Physcomitrella* gene within the fungi we performed a second phylogenetic analyses removing distantly related prokaryote sequences and adjusting the alignment character sampling (**6B**). Phylogenetic analyses based upon this second alignment strongly supported the grouping of the plant sequence with the fungi but did not strongly support the placement of the *Physcomitrella* gene within the fungal clade. However, the taxonomic distribution of this gene family demonstrates a wide paralogous distribution in the fungi and prokaryotes and a very narrow distribution in all other eukaryotes sampled with a single plant sequence detected. Taken together this suggests a fungus-to-plant gene transfer event.

The phylogeny was calculated from an alignment of 55 sequences and 174 amino acid characters (**6A**) and an alignment of 34 sequences and 247 amino acid characters (**6B**). Modelgenerator (Keane et al., 2004) analysis demonstrated that a WAG substitution matrix,  $\Gamma$  distribution ( $\alpha = 2.03$ ), and a proportion of invariant sites ( $I = 0.03$ ) model of site rate heterogeneity were the most appropriate parameters for the **6A** data set. While a WAG substitution matrix,  $\Gamma$  distribution ( $\alpha = 65$ ), and a proportion of invariant sites ( $I = 0.068$ ) model of site rate heterogeneity were the most appropriate parameters for the **6B** data set. The phylogenetic trees shown were calculated using the fast maximum likelihood program phyML (Guindon and Gascuel, 2003), with 1000 bootstrap replicates and SH analyses of each node (as described in the main text of the paper). To test further the topological result we also ran a MrBayes (Ronquist and Huelsenbeck, 2003) analyses and 100 RAxML (Stamatakis, 2006) bootstrap replicates (as described in the main text of the paper). The key for each tree shows the short hand description of topology support values in the order Bayesian posterior probability / % bootstrap support (phyML + RAxML). Shaded discs represent nodes with ‘robust’ topology support values, while rings demonstrate nodes with ‘moderate’ topology support values (actual cut off values are given on the key). For key nodes the

actual support values are shown in the order Bayesian Posterior Probability / 1000 phyML bootstraps / 100 RAxML bootstraps / phyML node-by-node SH test.

The species are labelled with an identifier code in square brackets, relating to the source of sequence data. These include GenBank protein accession codes and GI numbers, Broad Institute gene identifiers (in some cases curtailed for program compatibility reasons), and DOE JGI gene identifiers with a 4 letter species codes that we have added. The source of all the genome sequences used in the pipeline analysis is listed in Supplemental Table 1. All additional non-genome project sequences are from GenBank. As genome sequence identifiers are continually updated we have provided additional supporting material with all the sequences used as Seaview (Galtier et al., 1996) alignment files.

To compare the HGT scenarios with an alternative hypothesis of gene duplication events and gene loss (hidden paralogy) we drew a cladogram demonstrating gene duplication and gene loss events that would be necessary to generate the phylogenetic results shown without a HGT event (6C). These trees were based on an underlying eukaryotic species phylogeny. Because there is uncertainty about the relative branching order of many eukaryotic groups we restricted the underlying eukaryotic species phylogeny to strongly supported branching relationships among the Plantae, the Fungi, and their sister group the metazoa (Rodriguez-Ezpeleta et al., 2005; James et al., 2006). As such this analyses underestimates the number of gene duplication and gene loss events required for the alternative hypothesis of hidden paralogy. Only duplication (D) and loss (L) events required to invoke the hidden paralogy are marked (all other loss events are not scored). For hidden paralogy to explain the branching of the plant within the fungal clade, given the taxon sampling available for this analysis, a minimum of 16 independent gene loss events are required. This compares to the scenario of a single fungi-to-plant HGT event.

6A

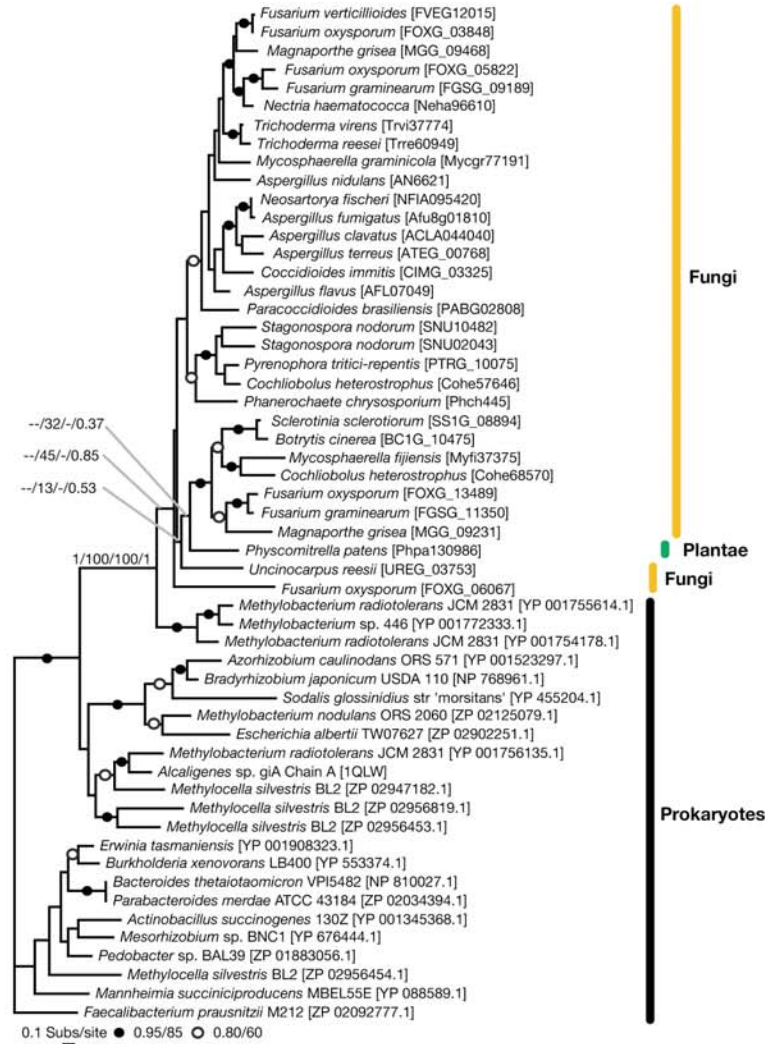

6B

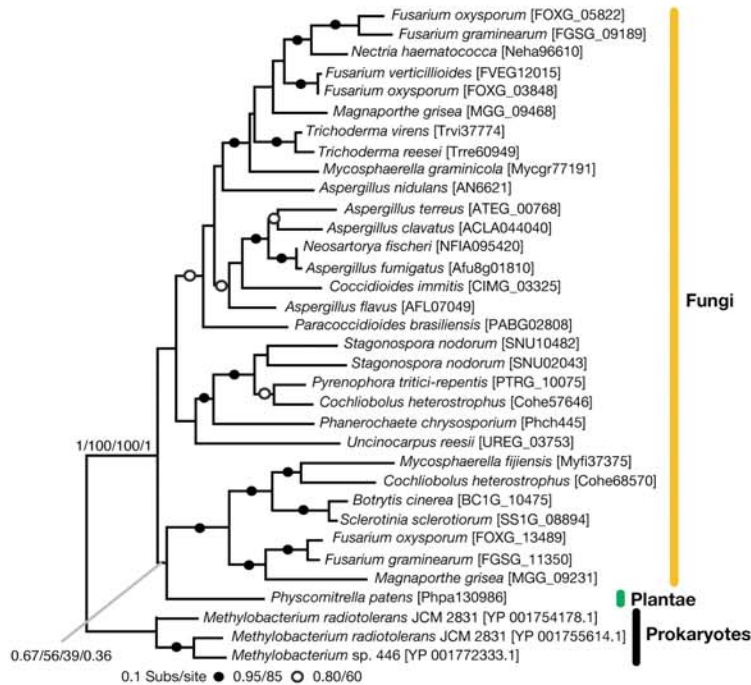

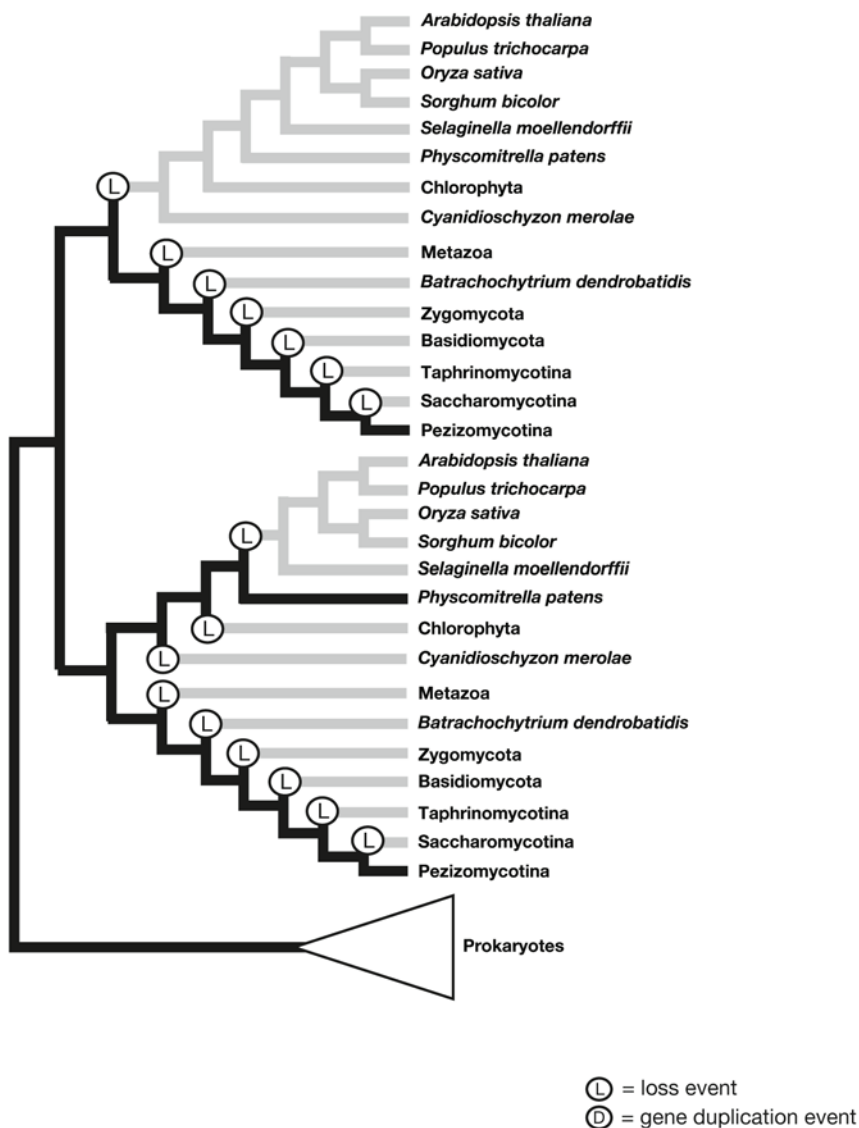

## REFERENCES

- Galtier, N., Gouy, M., and Gautier, C.** (1996). SEAVIEW and PHYLO\_WIN: two graphic tools for sequence alignment and molecular phylogeny. *Comput. Appl. Biosci.* **12**, 543-548.
- Guindon, S., and Gascuel, O.** (2003). A simple, fast, and accurate algorithm to estimate large phylogenies by maximum likelihood. *Syst. Biol.* **52**, 696-704.
- James, T.Y., Kauff, F., Schoch, C.L., Matheny, P.B., Hofstetter, V., Cox, C.J., Celio, G., Gueidan, C., Fraker, E., Miadlikowska, J., Lumbsch, H.T., Rauhut, A., Reeb, V., Arnold, A.E., Amtoft, A., Stajich, J.E., Hosaka, K., Sung, G.H., Johnson, D., O'Rourke, B., Crockett, M., Binder, M., Curtis, J.M., Slot, J.C., Wang, Z., Wilson, A.W., Schussler, A., Longcore, J.E., O'Donnell, K., Mozley-Standridge, S., Porter, D., Letcher, P.M., Powell, M.J., Taylor, J.W., White, M.M., Griffith, G.W., Davies, D.R., Humber, R.A., Morton, J.B., Sugiyama, J., Rossman, A.Y., Rogers, J.D., Pfister, D.H., Hewitt, D., Hansen, K., Hambleton, S., Shoemaker, R.A., Kohlmeyer, J., Volkmann-**

- Kohlmeyer, B., Spotts, R.A., Serdani, M., Crous, P.W., Hughes, K.W., Matsuura, K., Langer, E., Langer, G., Untereiner, W.A., Lucking, R., Budel, B., Geiser, D.M., Aptroot, A., Diederich, P., Schmitt, I., Schultz, M., Yahr, R., Hibbett, D.S., Lutzoni, F., McLaughlin, D.J., Spatafora, J.W., and Vilgalys, R.** (2006). Reconstructing the early evolution of Fungi using a six-gene phylogeny. *Nature* **443**, 818-822.
- Keane, T.M., Creevey, C.J., Naughton, T.J., Pentony, M.M., Naughton, T.J., and Mcinerney, J.O.** (2004). Assessment of methods for amino acid matrix selection and their use on empirical data shows that ad hoc assumptions for choice of matrix are not justified. *BMC Evol. Biol.* **6**, 29.
- Rodriguez-Ezpeleta, N., Brinkmann, H., Burey, S.C., Roure, B., Burger, G., Loffelhardt, W., Bohnert, H.J., Philippe, H., and Lang, B.F.** (2005). Monophyly of primary photosynthetic eukaryotes: green plants, red algae, and glaucophytes. *Curr. Biol.* **15**, 1325-1330.
- Ronquist, F., and Huelsenbeck, J.P.** (2003). MrBayes 3: Bayesian phylogenetic inference under mixed models. *Bioinformatics* **19**, 1572-1574.
- Stamatakis, A.** (2006). RAxML-VI-HPC: maximum likelihood-based phylogenetic analyses with thousands of taxa and mixed models. *Bioinformatics* **22**, 2688-2690.



**Supplemental Figure 7. Description of phylogenetic analysis, including the models used and database sequence accession numbers for the phylogenetic tree shown on 4A.**

**Figure 7.** Phylogeny of the putative carboxy-terminal peptidase-like protein encoding gene family, demonstrating a candidate plant-to-fungal gene transfer. This protein family is mainly restricted to the land plants with each land plant genome surveyed encoding several paralogous copies of this gene family. However, we detected multiple putative homologues of this gene in the basidiomycete *Laccaria bicolor* and two divergent prokaryote lineages (*Xanthomonas* and *Methylocella*). The taxonomic distribution of this gene family demonstrates a wide paralogous distribution in the plants and very narrow distribution in the fungi and prokaryotes sampled. Taken together, this suggests a plant-to-fungus gene transfer event either involving a prokaryote intermediate, or additional transfer to prokaryotes.

The phylogeny was calculated from an alignment of 87 sequences and 210 amino acid characters. Modelgenerator (Keane et al., 2004) analysis demonstrated that a WAG substitution matrix, and a  $\Gamma$  distribution ( $\alpha = 1.606$ ) model of site rate heterogeneity were the most appropriate parameters for this dataset. The phylogeny shown was calculated using the fast maximum likelihood program PhyML (Guindon and Gascuel, 2003), with 1000 bootstrap replicates and SH analyses (Anisimova and Gascuel, 2006) of each node (as described in the main text of the paper). To further test the topological result we also ran a MrBayes (Ronquist and Huelsenbeck, 2003) analysis and 100 RAxML (Stamatakis, 2006) bootstrap replicates (as described in the main text of the paper). The key for each tree shows the short hand description of topology support values in the order Bayesian posterior probability / % bootstrap support (PhyML + RAxML).

The species are labelled with an identifier code in square brackets, relating to the source of sequence data. These include GenBank protein accession codes and GI numbers, Broad Institute gene identifiers (in some cases curtailed for program compatibility reasons), and DOE JGI gene identifiers with a 4 letter species codes that we have added. The source of all the genome sequences used in the pipeline analysis is listed in Supplemental Table 1. All additional non-genome project sequences are from GenBank. As genome sequence identifiers are continually updated we have provided additional supporting material with all the sequences used as Seaview (Galtier et al., 1996) alignment files.

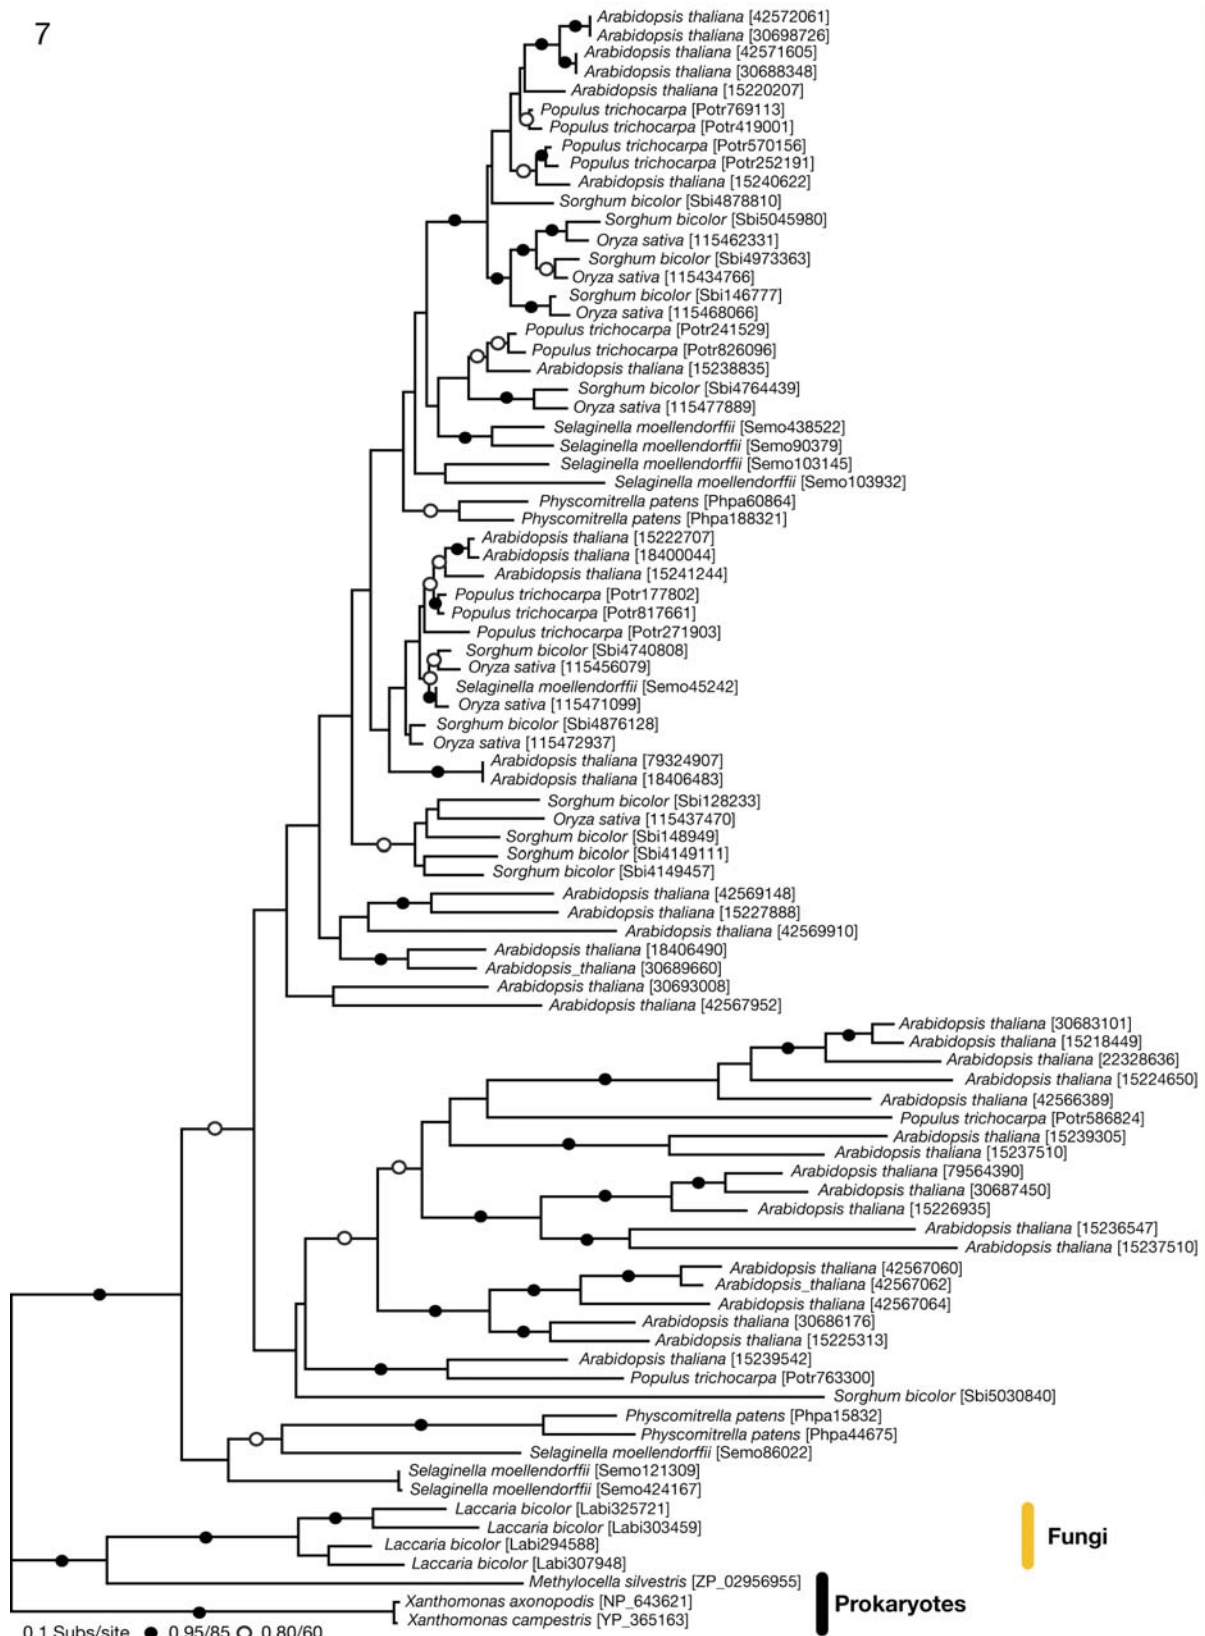

## REFERENCES

- Anisimova, M., and Gascuel, O.** (2006). Approximate likelihood-ratio test for branches: A fast, accurate, and powerful alternative. *Syst. Biol.* **55**, 539-552.
- Galtier, N., Gouy, M., and Gautier, C.** (1996). SEAVIEW and PHYLO\_WIN: two graphic tools for sequence alignment and molecular phylogeny. *Comput. Appl. Biosci.* **12**, 543-548.
- Guindon, S., and Gascuel, O.** (2003). A simple, fast, and accurate algorithm to estimate large phylogenies by maximum likelihood. *Syst. Biol.* **52**, 696-704.
- Keane, T.M., Creevey, C.J., Naughton, T.J., Pentony, M.M., Naughton, T.J., and Mcinerney, J.O.** (2004). Assessment of methods for amino acid matrix selection and their use on empirical data shows that ad hoc assumptions for choice of matrix are not justified. *BMC Evol. Biol.* **6**, 29.
- Ronquist, F., and Huelsenbeck, J.P.** (2003). MrBayes 3: Bayesian phylogenetic inference under mixed models. *Bioinformatics* **19**, 1572-1574.
- Stamatakis, A.** (2006). RAxML-VI-HPC: maximum likelihood-based phylogenetic analyses with thousands of taxa and mixed models. *Bioinformatics* **22**, 2688-2690.

**Supplemental Figure 8. Description of phylogenetic analysis, including the models used and database sequence accession numbers for the phylogenetic tree shown on 4B.**

**Figure 8.** Phylogeny of the putative phosphate-responsive 1 protein encoding gene family, demonstrating a candidate plant-to-fungal gene transfer. This protein family is mainly restricted to the land plant with each plant genome surveyed encoding several paralogous copies of this gene family. However, we detected multiple putative homologues of this gene in the chytrid *Batrachochytrium dendrobatidis* and one prokaryote sequence (*Solibacter usitatus*). The taxonomic distribution of this gene family demonstrates a wide paralogous distribution in the plants and very narrow distribution in the fungi and prokaryotes sampled. Taken together this suggests a plant-to-fungus gene transfer event either involving prokaryote intermediate or additional transfers to a prokaryote genome.

The phylogeny was calculated from an alignment of 93 sequences and 198 amino acid characters. Modelgenerator (Keane et al., 2004) analysis demonstrated that a WAG substitution matrix, and a  $\Gamma$  distribution ( $\alpha = 1.381$ ) model of site rate heterogeneity were the most appropriate parameters for this dataset. The phylogeny shown was calculated using the fast maximum likelihood program PhyML (Guindon and Gascuel, 2003), with 1000 bootstrap replicates and SH analyses (Anisimova and Gascuel, 2006) of each node (as described in the main text of the paper). To further test the topological result we also ran a MrBayes (Ronquist and Huelsenbeck, 2003) analysis and 100 RAxML (Stamatakis, 2006) bootstrap replicates (as described in the main text of the paper). The key for each tree shows the short hand description of topology support values in the order Bayesian posterior probability / % bootstrap support (PhyML + RAxML). Shaded discs represent nodes with ‘robust’ topology support values, while rings demonstrate nodes with ‘moderate’ topology support values (actual cut off values are given on the key).

The species are labelled with an identifier code in square brackets, relating to the source of sequence data. These include GenBank protein accession codes and GI numbers, Broad Institute gene identifiers (in some cases curtailed for program compatibility reasons), and DOE JGI gene identifiers with a 4 letter species codes that we have added. The source of all the genome sequences used in the pipeline analysis is listed in Supplemental Table 1. All additional non-genome project sequences are from GenBank. As genome sequence identifiers are continually updated we have provided additional supporting material with all the sequences used as Seaview (Galtier et al., 1996) alignment files.

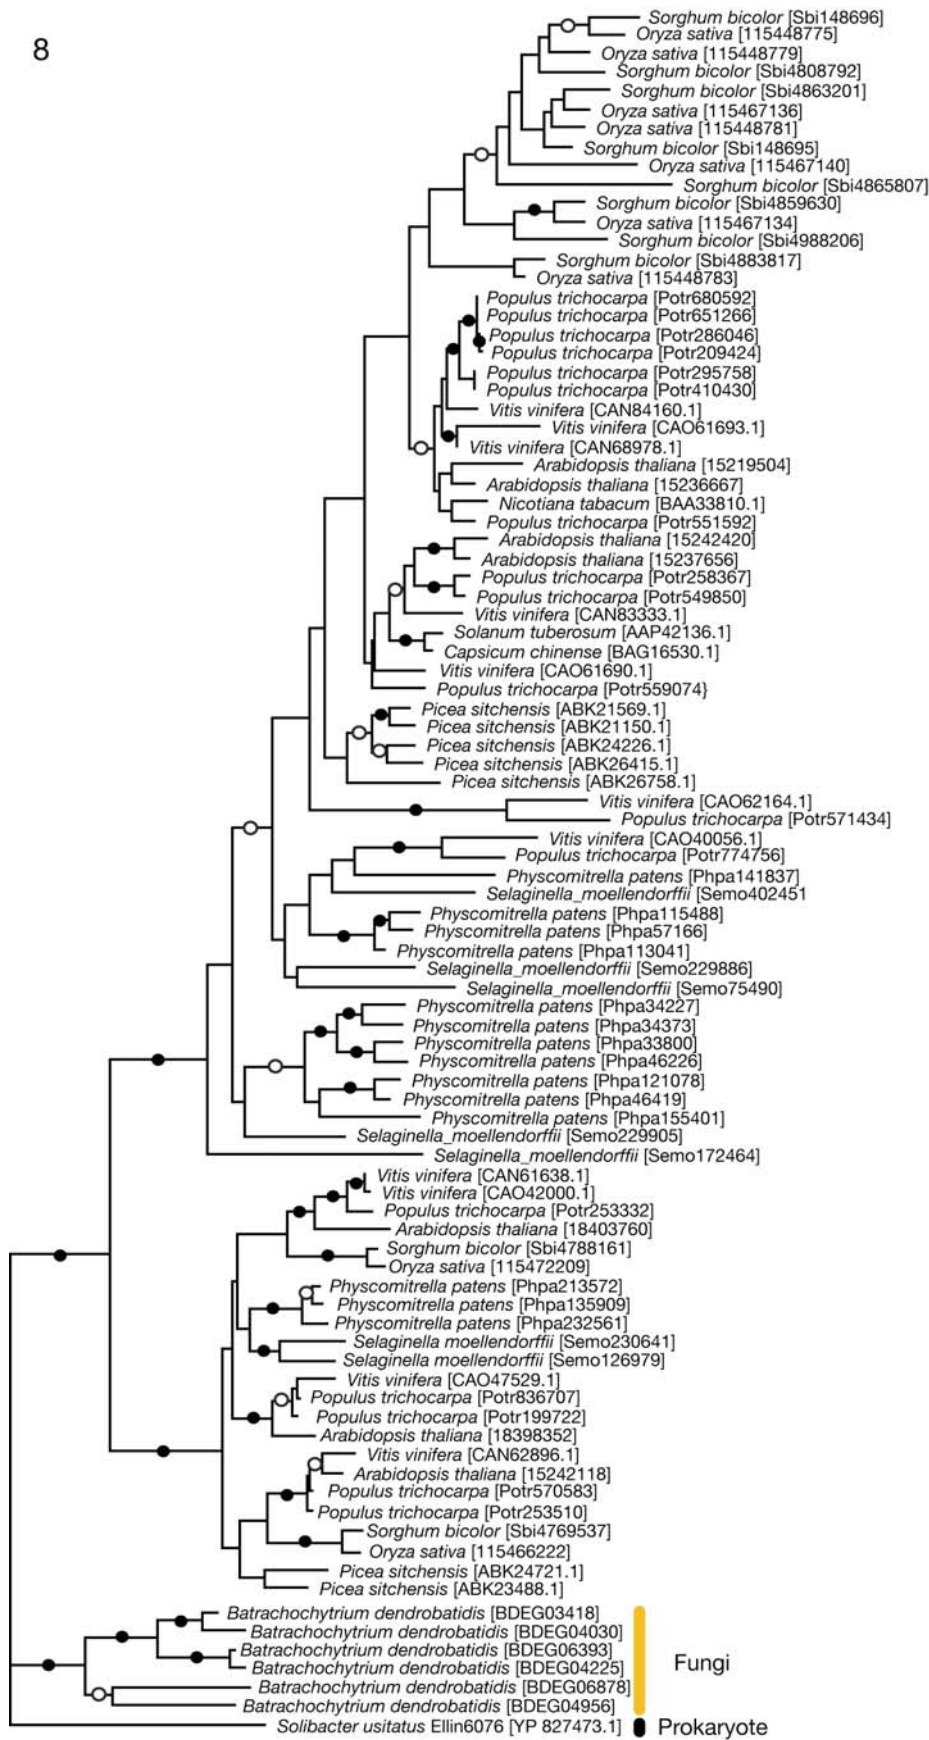

Plantae

Fungi

Prokaryote

0.1 Subs/site ● 0.95/85 ○ 0.80/60

## REFERENCES

- Anisimova, M., and Gascuel, O.** (2006). Approximate likelihood-ratio test for branches: A fast, accurate, and powerful alternative. *Syst. Biol.* **55**, 539-552.
- Galtier, N., Gouy, M., and Gautier, C.** (1996). SEAVIEW and PHYLO\_WIN: two graphic tools for sequence alignment and molecular phylogeny. *Comput. Appl. Biosci.* **12**, 543-548.
- Guindon, S., and Gascuel, O.** (2003). A simple, fast, and accurate algorithm to estimate large phylogenies by maximum likelihood. *Syst. Biol.* **52**, 696-704.
- Keane, T.M., Creevey, C.J., Naughton, T.J., Pentony, M.M., Naughton, T.J., and Mcinerney, J.O.** (2004). Assessment of methods for amino acid matrix selection and their use on empirical data shows that ad hoc assumptions for choice of matrix are not justified. *BMC Evol. Biol.* **6**, 29.
- Ronquist, F., and Huelsenbeck, J.P.** (2003). MrBayes 3: Bayesian phylogenetic inference under mixed models. *Bioinformatics* **19**, 1572-1574.
- Stamatakis, A.** (2006). RAxML-VI-HPC: maximum likelihood-based phylogenetic analyses with thousands of taxa and mixed models. *Bioinformatics* **22**, 2688-2690.

**Supplemental Figure 9. Description of phylogenetic analysis, including the models used and database sequence accession numbers for the phylogenetic tree shown on 4C.**

**Figure 9.** Phylogeny of unknown / conserved hypothetical protein family with similarity to zinc finger (C2H2 type) proteins, demonstrating a candidate plant-to-fungus gene transfer. This gene family was restricted to the land plants. However, we found that the closely related ascomycete fungi (*Sclerotinia sclerotiorum* and *Botrytis cinerea*) also possess putative homologues of this protein family. This taxon distribution suggests a plant-to-fungi gene transfer

The phylogeny was calculated from an alignment of 13 sequences and 222 amino acid characters. Modelgenerator (Keane et al., 2004) analysis demonstrated that a JTT substitution matrix,  $\Gamma$  distribution ( $\alpha = 1.95$ ), and a proportion of invariant sites ( $I = 0.19$ ) model of site rate heterogeneity were the most appropriate parameters for this dataset. The phylogeny shown was calculated using the fast maximum likelihood program PhyML (Guindon and Gascuel, 2003), with 1000 bootstrap replicates and SH analyses (Anisimova and Gascuel, 2006) of each node (as described in the main text of the paper). To further test the topological result we also ran a MrBayes (Ronquist and Huelsenbeck, 2003) analyses and 100 RAxML (Stamatakis, 2006) bootstrap replicates (as described in the main text of the paper). The key for each tree shows the short hand description of topology support values in the order Bayesian posterior probability / % bootstrap support (PhyML + RAxML). Shaded discs represent nodes with ‘robust’ topology support values, while rings demonstrate nodes with ‘moderate’ topology support values (actual cut off values are given on the key).

The species are labelled with an identifier code in square brackets, relating to the source of sequence data. These include GenBank protein accession codes and GI numbers, Broad Institute gene identifiers (in some cases curtailed for program compatibility reasons), and DOE JGI gene identifiers with a 4 letter species codes that we have added. The source of all the genome sequences used in the pipeline analysis is listed in Supplemental Table 1. All additional non-genome project sequences are from GenBank. As genome sequence identifiers are continually updated we have provided additional supporting material with all the sequences used as Seaview alignment files (Galtier et al., 1996).

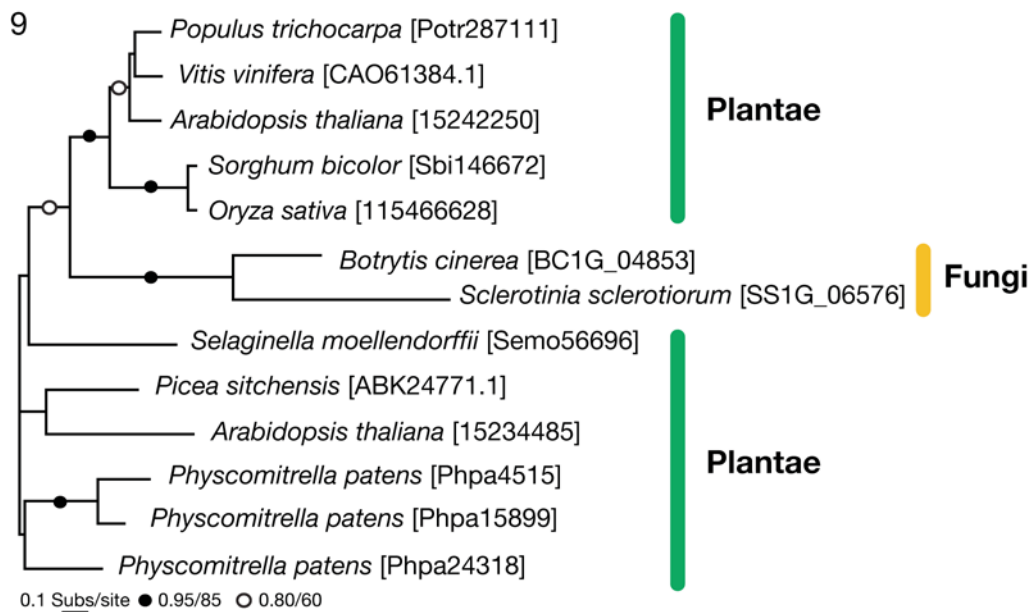

## REFERENCES

- Anisimova, M., and Gascuel, O.** (2006). Approximate likelihood-ratio test for branches: A fast, accurate, and powerful alternative. *Syst. Biol.* **55**, 539-552.
- Galtier, N., Gouy, M., and Gautier, C.** (1996). SEAVIEW and PHYLO\_WIN: two graphic tools for sequence alignment and molecular phylogeny. *Comput. Appl. Biosci.* **12**, 543-548.
- Guindon, S., and Gascuel, O.** (2003). A simple, fast, and accurate algorithm to estimate large phylogenies by maximum likelihood. *Syst. Biol.* **52**, 696-704.
- Keane, T.M., Creevey, C.J., Naughton, T.J., Pentony, M.M., Naughton, T.J., and Mcinerney, J.O.** (2004). Assessment of methods for amino acid matrix selection and their use on empirical data shows that ad hoc assumptions for choice of matrix are not justified. *BMC Evol. Biol.* **6**, 29.
- Ronquist, F., and Huelsenbeck, J.P.** (2003). MrBayes 3: Bayesian phylogenetic inference under mixed models. *Bioinformatics* **19**, 1572-1574.
- Stamatakis, A.** (2006). RAxML-VI-HPC: maximum likelihood-based phylogenetic analyses with thousands of taxa and mixed models. *Bioinformatics* **22**, 2688-2690.



## Supplemental Table 1. Genomes used for HGT identification pipeline

### Search seed genomes (Source)

*Arabidopsis thaliana* (<http://www.ncbi.nlm.nih.gov/>)  
*Oryza sativa* (<http://www.ncbi.nlm.nih.gov/>)  
*Populus trichocarpa* (<http://genome.jgi-psf.org/>)  
*Selaginella moellendorffii* (<http://genome.jgi-psf.org/>)  
*Sorghum bicolor* (<http://genome.jgi-psf.org/>)  
*Physcomitrella patens* (<http://genome.jgi-psf.org/>)

For every plant search seed gene that had a higher BLAST search similarity to a fungal gene a phylogenetic analyses was conducted. Genomes compared:

| Fungi<br>(Source)                                                                                                                                  | Other Eukaryotes<br>(Source)                                                                                               | Prokaryotes<br>(Source = <a href="http://www.ncbi.nlm.nih.gov/">http://www.ncbi.nlm.nih.gov/</a> ) |
|----------------------------------------------------------------------------------------------------------------------------------------------------|----------------------------------------------------------------------------------------------------------------------------|----------------------------------------------------------------------------------------------------|
| <i>Aspergillus clavatus</i> ( <a href="http://www.broad.mit.edu/">http://www.broad.mit.edu/</a> )                                                  | <i>Aureococcus anophagefferens</i> ( <a href="http://genome.jgi-psf.org/">http://genome.jgi-psf.org/</a> )                 | <i>Aeromonas salmonicida</i>                                                                       |
| <i>Aspergillus flavus</i> ( <a href="http://www.broad.mit.edu/">http://www.broad.mit.edu/</a> )                                                    | <i>Caenorhabditis elegans</i> ( <a href="http://www.ncbi.nlm.nih.gov/">http://www.ncbi.nlm.nih.gov/</a> )                  | <i>Aeropyrum pernix</i>                                                                            |
| <i>Aspergillus fumigatus</i> ( <a href="http://www.broad.mit.edu/">http://www.broad.mit.edu/</a> )                                                 | <i>Chlamydomonas reinhardtii</i> ( <a href="http://genome.jgi-psf.org/">http://genome.jgi-psf.org/</a> )                   | <i>Agrobacterium tumefaciens</i>                                                                   |
| <i>Aspergillus nidulans</i> ( <a href="http://www.broad.mit.edu/">http://www.broad.mit.edu/</a> )                                                  | <i>Ciona intestinalis</i> ( <a href="http://genome.jgi-psf.org/">http://genome.jgi-psf.org/</a> )                          | <i>Alteromonadales bacterium TW-7</i>                                                              |
| <i>Aspergillus niger</i> ( <a href="http://www.broad.mit.edu/">http://www.broad.mit.edu/</a> )                                                     | <i>Cryptosporidium parvum</i> ( <a href="http://www.ncbi.nlm.nih.gov/">http://www.ncbi.nlm.nih.gov/</a> )                  | <i>Aquifex aeolicus</i>                                                                            |
| <i>Aspergillus oryzae</i> ( <a href="http://www.broad.mit.edu/">http://www.broad.mit.edu/</a> )                                                    | <i>Cyanidioschyzon merolae</i> ( <a href="http://merolae.biol.s.u-tokyo.ac.jp/">http://merolae.biol.s.u-tokyo.ac.jp/</a> ) | <i>Archaeoglobus fulgidus</i>                                                                      |
| <i>Aspergillus terreus</i> ( <a href="http://www.broad.mit.edu/">http://www.broad.mit.edu/</a> )                                                   | <i>Dictyostelium discoideum</i> ( <a href="http://www.ncbi.nlm.nih.gov/">http://www.ncbi.nlm.nih.gov/</a> )                | <i>Azoarcus sp. BH72</i>                                                                           |
| <i>Batrachochytrium dendrobatidis</i> ( <a href="http://www.broad.mit.edu/">http://www.broad.mit.edu/</a> )                                        | <i>Drosophila melanogaster</i> ( <a href="http://www.ncbi.nlm.nih.gov/">http://www.ncbi.nlm.nih.gov/</a> )                 | <i>Aster yellows witches-broom phytoplasma AYWB</i>                                                |
| <i>Botrytis cinerea</i> ( <a href="http://www.broad.mit.edu/">http://www.broad.mit.edu/</a> )                                                      | <i>Emiliana huxleyi</i> ( <a href="http://genome.jgi-psf.org/">http://genome.jgi-psf.org/</a> )                            | <i>Bacillus anthracis</i>                                                                          |
| <i>Candida albicans SC5314</i> ( <a href="http://www.broad.mit.edu/">http://www.broad.mit.edu/</a> )                                               | <i>Entamoeba histolytica</i> ( <a href="http://www.tigr.org/db.shtml">http://www.tigr.org/db.shtml</a> )                   | <i>Bacillus subtilis</i>                                                                           |
| <i>Chaetomium globosum</i> ( <a href="http://www.broad.mit.edu/">http://www.broad.mit.edu/</a> )                                                   | <i>Homo sapiens</i> ( <a href="http://www.ncbi.nlm.nih.gov/">http://www.ncbi.nlm.nih.gov/</a> )                            | <i>Bacteroides fragilis</i>                                                                        |
| <i>Coccidioides immitis</i> ( <a href="http://www.broad.mit.edu/">http://www.broad.mit.edu/</a> )                                                  | <i>Hyaloperonospora parasitica</i> ( <a href="http://genome.wustl.edu">http://genome.wustl.edu</a> )                       | <i>Bartonella henselae</i>                                                                         |
| <i>Cochliobolus heterostrophus</i> ( <a href="http://genome.jgi-psf.org/">http://genome.jgi-psf.org/</a> )                                         | <i>Giardia lamblia</i> ( <a href="http://www.tigr.org/db.shtml">http://www.tigr.org/db.shtml</a> )                         | <i>Bifidobacterium longum</i>                                                                      |
| <i>Coprinus cinereus</i> ( <a href="http://www.broad.mit.edu/">http://www.broad.mit.edu/</a> )                                                     | <i>Leishmania major</i> ( <a href="http://www.ncbi.nlm.nih.gov/">http://www.ncbi.nlm.nih.gov/</a> )                        | <i>Blastopirellula marina</i>                                                                      |
| <i>Cryptococcus neoformans</i> ( <a href="http://www.broad.mit.edu/">http://www.broad.mit.edu/</a> )                                               | <i>Lottia gigantea</i> ( <a href="http://genome.jgi-psf.org/">http://genome.jgi-psf.org/</a> )                             | <i>Bordetella pertussis</i>                                                                        |
| <i>Encephalitozoon cuniculi</i><br>( <a href="http://www.genoscope.cns.fr/spip/Projects.html">http://www.genoscope.cns.fr/spip/Projects.html</a> ) | <i>Micromonas pusilla</i> ( <a href="http://genome.jgi-psf.org/">http://genome.jgi-psf.org/</a> )                          | <i>Borrelia burgdorferi</i>                                                                        |
| <i>Fusarium graminearum</i> ( <a href="http://www.broad.mit.edu/">http://www.broad.mit.edu/</a> )                                                  | <i>Micromonas strain RCC299</i> ( <a href="http://genome.jgi-psf.org/">http://genome.jgi-psf.org/</a> )                    | <i>Bradyrhizobium japonicum</i>                                                                    |
| <i>Fusarium oxysporum</i> ( <a href="http://www.broad.mit.edu/">http://www.broad.mit.edu/</a> )                                                    | <i>Monosiga brevicollis</i> ( <a href="http://genome.jgi-psf.org/">http://genome.jgi-psf.org/</a> )                        | <i>Buchnera aphidicola</i>                                                                         |
| <i>Fusarium verticillioides</i> ( <a href="http://www.broad.mit.edu/">http://www.broad.mit.edu/</a> )                                              |                                                                                                                            | <i>Burkholderia mallei ATCC 23344</i>                                                              |
|                                                                                                                                                    |                                                                                                                            | <i>Campylobacter jejuni</i>                                                                        |

---

|                                                                                                                   |                                                                                                                 |                                                    |
|-------------------------------------------------------------------------------------------------------------------|-----------------------------------------------------------------------------------------------------------------|----------------------------------------------------|
| <i>Histoplasma capsulatum</i> ( <a href="http://www.broad.mit.edu/">http://www.broad.mit.edu/</a> )               | <i>Mus musculus</i> ( <a href="http://www.ncbi.nlm.nih.gov/">http://www.ncbi.nlm.nih.gov/</a> )                 | <i>Candidatus Protochlamydia amoebophila</i> UWE25 |
| <i>Laccaria bicolor</i> ( <a href="http://genome.jgi-psf.org/">http://genome.jgi-psf.org/</a> )                   | <i>Naegleria gruberi</i> ( <a href="http://genome.jgi-psf.org/">http://genome.jgi-psf.org/</a> )                | <i>Chlamydia trachomatis</i>                       |
| <i>Magnaporthe grisea</i> ( <a href="http://www.broad.mit.edu/">http://www.broad.mit.edu/</a> )                   | <i>Nematostella vectensis</i> ( <a href="http://genome.jgi-psf.org/">http://genome.jgi-psf.org/</a> )           | <i>Chlorobium tepidum</i>                          |
| <i>Mycosphaerella fijiensis</i> ( <a href="http://genome.jgi-psf.org/">http://genome.jgi-psf.org/</a> )           | <i>Ostreococcus lucimarinus</i> ( <a href="http://genome.jgi-psf.org/">http://genome.jgi-psf.org/</a> )         | <i>Clostridium perfringens</i>                     |
| <i>Mycosphaerella graminicola</i> ( <a href="http://genome.jgi-psf.org/">http://genome.jgi-psf.org/</a> )         | <i>Ostreococcus tauri</i> ( <a href="http://genome.jgi-psf.org/">http://genome.jgi-psf.org/</a> )               | <i>Corynebacterium glutamicum</i>                  |
| <i>Nectria haematococca</i> ( <a href="http://www.broad.mit.edu/">http://www.broad.mit.edu/</a> )                 | <i>Paramecium tetraurelia</i>                                                                                   | <i>Cytophaga hutchinsonii</i>                      |
| <i>Neosartorya fischeri</i> ( <a href="http://www.broad.mit.edu/">http://www.broad.mit.edu/</a> )                 | ( <a href="http://www.genoscope.cns.fr/spip/Projects.html">http://www.genoscope.cns.fr/spip/Projects.html</a> ) | <i>Dechloromonas aromatica</i>                     |
| <i>Neurospora crassa</i> ( <a href="http://www.broad.mit.edu/">http://www.broad.mit.edu/</a> )                    | <i>Phaeodactylum tricornutum</i> ( <a href="http://genome.jgi-psf.org/">http://genome.jgi-psf.org/</a> )        | <i>Desulfuromonas acetoxidans</i>                  |
| <i>Paracoccidioides brasiliensis</i> ( <a href="http://www.broad.mit.edu/">http://www.broad.mit.edu/</a> )        | <i>Phytophthora infestans</i> ( <a href="http://www.broad.mit.edu/">http://www.broad.mit.edu/</a> )             | <i>Ehrlichia ruminantium</i>                       |
| <i>Phanerochaete chrysosporium</i> ( <a href="http://genome.jgi-psf.org/">http://genome.jgi-psf.org/</a> )        | <i>Phytophthora ramorum</i> ( <a href="http://genome.jgi-psf.org/">http://genome.jgi-psf.org/</a> )             | <i>Escherichia coli</i>                            |
| <i>Phycomyces blakesleeanus</i> ( <a href="http://genome.jgi-psf.org/">http://genome.jgi-psf.org/</a> )           | <i>Phytophthora sojae</i> ( <a href="http://genome.jgi-psf.org/">http://genome.jgi-psf.org/</a> )               | <i>Flavobacteria bacterium</i> BAL38               |
| <i>Pichia stipitis</i> ( <a href="http://genome.jgi-psf.org/">http://genome.jgi-psf.org/</a> )                    | <i>Plasmodium yoelii</i> ( <a href="http://www.tigr.org/db.shtml">http://www.tigr.org/db.shtml</a> )            | <i>Geobacillus kaustophilus</i>                    |
| <i>Podospira anserine</i> ( <a href="http://podospira.igmors.u-psud.fr/">http://podospira.igmors.u-psud.fr/</a> ) | <i>Tetrahymena thermophila</i> ( <a href="http://www.tigr.org/db.shtml">http://www.tigr.org/db.shtml</a> )      | <i>Geobacter uraniumreducens</i>                   |
| <i>Postia placenta</i> ( <a href="http://genome.jgi-psf.org/">http://genome.jgi-psf.org/</a> )                    | <i>Thalassiosira pseudonana</i> ( <a href="http://genome.jgi-psf.org/">http://genome.jgi-psf.org/</a> )         | <i>Gloeobacter violaceus</i>                       |
| <i>Puccinia graminis</i> ( <a href="http://www.broad.mit.edu/">http://www.broad.mit.edu/</a> )                    | <i>Toxoplasma gondii</i> ( <a href="http://www.tigr.org/db.shtml">http://www.tigr.org/db.shtml</a> )            | <i>Haemophilus influenzae</i>                      |
| <i>Pyrenophora tritici-repentis</i> ( <a href="http://www.broad.mit.edu/">http://www.broad.mit.edu/</a> )         | <i>Trichomonas vaginalis</i> ( <a href="http://www.tigr.org/db.shtml">http://www.tigr.org/db.shtml</a> )        | <i>Halobacterium</i> sp. NRC-1                     |
| <i>Rhizopus oryzae</i> ( <a href="http://www.broad.mit.edu/">http://www.broad.mit.edu/</a> )                      | <i>Trichoplax adhaerens</i> ( <a href="http://genome.jgi-psf.org/">http://genome.jgi-psf.org/</a> )             | <i>Helicobacter pylori</i>                         |
| <i>Saccharomyces cerevisiae</i> ( <a href="http://www.ncbi.nlm.nih.gov/">http://www.ncbi.nlm.nih.gov/</a> )       | <i>Trypanosoma brucei</i> ( <a href="http://www.tigr.org/db.shtml">http://www.tigr.org/db.shtml</a> )           | <i>Kineococcus radiotolerans</i>                   |
| <i>Schizosaccharomyces pombe</i> ( <a href="http://www.ncbi.nlm.nih.gov/">http://www.ncbi.nlm.nih.gov/</a> )      | <i>Trypanosoma cruzi</i> ( <a href="http://www.tigr.org/db.shtml">http://www.tigr.org/db.shtml</a> )            | <i>Lactobacillus plantarum</i>                     |
| <i>Sclerotinia sclerotiorum</i> ( <a href="http://www.broad.mit.edu/">http://www.broad.mit.edu/</a> )             | <i>Xenopus tropicalis</i> ( <a href="http://genome.jgi-psf.org/">http://genome.jgi-psf.org/</a> )               | <i>Leptospira interrogans</i>                      |
| <i>Sporobolomyces roseus</i> ( <a href="http://genome.jgi-psf.org/">http://genome.jgi-psf.org/</a> )              | <i>Volvox carteri</i> ( <a href="http://genome.jgi-psf.org/">http://genome.jgi-psf.org/</a> )                   | <i>Magnetococcus</i> sp. MC-1                      |
| <i>Stagonospora nodorum</i> ( <a href="http://www.broad.mit.edu/">http://www.broad.mit.edu/</a> )                 |                                                                                                                 | <i>Methanosarcina mazei</i>                        |
| <i>Trichoderma reesei</i> ( <a href="http://genome.jgi-psf.org/">http://genome.jgi-psf.org/</a> )                 |                                                                                                                 | <i>Methylobacillus flagellatus</i>                 |
| <i>Trichoderma virens</i> ( <a href="http://genome.jgi-psf.org/">http://genome.jgi-psf.org/</a> )                 |                                                                                                                 | <i>Mycobacterium tuberculosis</i>                  |
| <i>Uncinocarpus reesii</i> ( <a href="http://www.broad.mit.edu/">http://www.broad.mit.edu/</a> )                  |                                                                                                                 | <i>Myxococcus xanthus</i>                          |
| <i>Ustilago maydis</i> ( <a href="http://www.broad.mit.edu/">http://www.broad.mit.edu/</a> )                      |                                                                                                                 | <i>Nanoarchaeum equitans</i>                       |
| <i>Yarrowia lipolytica</i> ( <a href="http://www.ncbi.nlm.nih.gov/">http://www.ncbi.nlm.nih.gov/</a> )            |                                                                                                                 | <i>Nitrosomonas eutropha</i>                       |
|                                                                                                                   |                                                                                                                 | <i>Nostoc punctiforme</i>                          |
|                                                                                                                   |                                                                                                                 | <i>Picrophilus torridus</i>                        |
|                                                                                                                   |                                                                                                                 | <i>Porphyromonas gingivalis</i>                    |
|                                                                                                                   |                                                                                                                 | <i>Prochlorococcus marinus</i>                     |
|                                                                                                                   |                                                                                                                 | <i>Pyrobaculum aerophilum</i>                      |
|                                                                                                                   |                                                                                                                 | <i>Pyrococcus abyssi</i>                           |
|                                                                                                                   |                                                                                                                 | <i>Rhodospirillum rubrum</i>                       |
|                                                                                                                   |                                                                                                                 | <i>Rickettsia typhi</i>                            |
|                                                                                                                   |                                                                                                                 | <i>Roseiflexus castenholzii</i>                    |
|                                                                                                                   |                                                                                                                 | <i>Staphylococcus aureus</i>                       |
|                                                                                                                   |                                                                                                                 | <i>Streptomyces avermitilis</i>                    |
|                                                                                                                   |                                                                                                                 | <i>Sulfolobus tokodaii</i>                         |
|                                                                                                                   |                                                                                                                 | <i>Synechococcus</i> sp. WH 8102                   |

---

*Syntrophus aciditrophicus*  
*Thermobifida fusca*  
*Thermosynechococcus elongatus*  
*Thermotoga maritima*  
*Treponema denticola*  
*Ureaplasma parvum*  
*Vibrio cholerae*  
*Xanthomonas oryzae*  
*Xylella fastidiosa*

**Supplemental Table 2. Results of phylogenetic analysis of genes linked to the 9 plant-fungi HGTs on the genome contigs of the HGT recipient taxa.** The table summarises the results of phylogenetic analysis of three open reading frames immediately 5' and 3' of each putatively transferred gene from each of the recipient genome sequences. This data is further summarised in Figure 5. One of the HGTs was present in two closely related recipient genomes (Figure 4c), therefore they were judged to be two independent samples and unlikely to be due to two identical gene contamination events. In the remaining 8 HGTs the phylogenetic and comparative genome data demonstrated that the HGT candidate gene was located on a contiguous section of chromosome sequence flanked by gene sequences where we were able to demonstrate conventional vertical inheritance, such that the gene approximated species phylogeny so that alternative hypothesis of gene ancestry were non-parsimonious. Patterns of vertical inheritance were pinpointed based upon either a tree topology showing the gene branching with species known to be close evolutionary relatives of the genome species, or that the taxon distribution of the gene was limited to close evolutionary relatives. In all cases we adjusted the phylogenetic analyses pipeline sampling threshold to include a wide as possible taxon sampling in order to address the question of gene ancestry. The table summarises the sampling thresholds used for each dataset.

| HGT (Fig.) | Gene                | Upstream        | BLAST sampling threshold - Result                          | Downstream   | BLAST sampling threshold - Result                          |
|------------|---------------------|-----------------|------------------------------------------------------------|--------------|------------------------------------------------------------|
| 1a         | <b>Phpa(173818)</b> | Phpa(63772)     | Unique gene (no hits at 1e-5)                              | Phpa(63774)  | 1e-5, potential TE, 1913 hits vs Ppatens genome at 1e-20   |
|            |                     | Phpa(158455)    | No tree, only one hit (Semo(409669) at 1e-5)               | Phpa(63775)  | 1e-5, potential TE, 3253 hits vs Ppatens genome at 1e-20   |
|            |                     | Phpa(111080)    | 1e-20 - clusters with plants                               | Phpa(63776)  | 1e-5, potential TE, > 3429 hits vs Ppatens genome at 1e-20 |
| 1b         | <b>BDEG_06896</b>   | BDEG_06895      | 1e-5 - fungal only                                         | BDEG_06897   | 1e-20 - clusters with fungi                                |
|            |                     | BDEG_06894      | 1e-20 - clusters with fungi                                | BDEG_06898   | 1e-15 - clusters with fungi                                |
|            |                     | BDEG_06893      | 1e-30 - clusters with fungi                                | BDEG_06899   | 1e-20 - clusters with fungi                                |
| 1c         | <b>Semo(120147)</b> | Semo(20613)     | 1e-20 - plants only                                        | Semo(423569) | 1e-5 - Selaginella specific gene family                    |
|            |                     | Semo(423566)    | 1e-20 - plants only                                        | Semo(445894) | 1e-10 - clusters with plants                               |
|            |                     | Semo(72148)     | 1e-20 - plants only                                        | Semo(19624)  | 1e-5 - plants only                                         |
| 2-         | <b>Semo(137360)</b> | Semo(431654)    | 1e-10 - only present in Selaginella and Physcomitrella     | Semo(431673) | 1e-10 - plants only                                        |
|            |                     | no gene present |                                                            | Semo(431674) | 1e-5 - Selaginella only (6 genes)                          |
|            |                     | no gene present |                                                            | Semo(431681) | 1e-5 - Selaginella only (3 genes)                          |
|            | <b>Semo(121880)</b> | Semo(424337)    | 1e-5 - Selaginella only (4 genes)                          | Semo(19275)  | 1e-5 - Selaginella specific gene family                    |
|            |                     | Semo(424334)    | 1e-5 - plants only                                         | Semo(446215) | 1e-20 - clusters with plants                               |
|            | <b>Semo(79756)</b>  | Semo(424333)    | Unique gene (no hits at 1e-5)                              | Semo(121832) | 1e-20 - clusters with plants                               |
|            |                     | Semo(80654)     | 1e-30 - clusters with plants                               | Semo(80323)  | 1e-20 - clusters with plants                               |
|            |                     | Semo(404818)    | 1e-5 - Selaginella only (3 genes)                          | Semo(73023)  | 1e-10 - Selaginella only (4 genes), same tree as Semo(7302 |
|            |                     | Semo(73021)     | 1e-10 - Selaginella only (4 genes), same tree as Semo(7302 | Semo(27379)  | 1e-30 - clusters with plants                               |
| 3a         | <b>Semo(407912)</b> | Semo(230913)    | 1e-30 - looks good                                         | Semo(407913) | Unique gene (no hits at 1e-5)                              |
|            |                     | Semo(407910)    | No tree, only one hit (Semo(417849) at 1e-5)               | Semo(407914) | 1e-5 - Selaginella specific gene family                    |
|            |                     | Semo(85570)     | 1e-20 - plants only                                        | Semo(407915) | 1e-5 - plants only                                         |
| 3b         | <b>Phpa(130986)</b> | Phpa(80292)     | 1e-5, potential TE,                                        | Phpa(130938) | 1e-20 - clusters with plants                               |
|            |                     | Phpa(80291)     | Unique gene (no hits at 1e-5)                              | Phpa(106587) | 1e-40 - clusters with plants                               |
|            |                     | Phpa(80290)     | Unique gene (no hits at 1e-5)                              | Phpa(185688) | 1e-10 - clusters with plants                               |
| 4a         | <b>Labi_325721</b>  | Labi_318106     | Unique gene (no hits at 1e-5)                              | Labi_325722  | Unique gene (no hits at 1e-5)                              |
|            |                     | Labi_325720     | 1e-30 - fungal only                                        | Labi_151444  | 1e-30 - fungal only                                        |
|            |                     | Labi_318103     | 1e-30 - fungal only                                        | Labi_318108  | 1e-30 - fungal only                                        |
|            | <b>Labi_303459</b>  | Labi_294871     | 1e-30 - fungal only                                        | Labi_303460  | 1e-30 - fungal only                                        |
|            |                     | Labi_303457     | 1e-20 - basidiomycete only                                 | Labi_303461  | 1e-5 - Laccaria only (7 genes)                             |
|            |                     | Labi_303456     | Unique gene (no hits at 1e-5)                              | Labi_329878  | 1e-5 - basidiomycete only                                  |
|            | <b>Labi_294588</b>  | Labi_299574     | 1e-30 - fungal only                                        | Labi_299576  | 1e-5 - Laccaria only (5 genes)                             |
|            |                     | Labi_299573     | 1e-5, one hit - Coprinus cinereus                          | Labi_299578  | Unique gene (no hits at 1e-5)                              |
|            |                     | Labi_236267     | 1e-30 - fungal only                                        | Labi_328458  | 1e-20 - basidiomycete only                                 |
|            | <b>Labi_307948</b>  | Labi_307947     | Unique gene (no hits at 1e-5)                              | Labi_295356  | 1e-5 - Laccaria, Coprinus, 16 Laccaria hits at 1e-5        |
|            |                     | Labi_295355     | Unique gene (no hits at 1e-5)                              | Labi_174921  | 1e-20 - clusters with fungi                                |
|            |                     | Labi_332008     | 1e-20 - fungal only                                        | Labi_332014  | Unique gene (no hits at 1e-5)                              |
| 4b         | <b>BDEG_03418</b>   | BDEG_03417      | Unique gene (no hits at 1e-5)                              | BDEG_03419   | 1e-5, with bacteria                                        |
|            |                     | BDEG_03416      | 1e-20 - with Dictyostelium                                 | BDEG_03420   | 1e-5, with bacteria                                        |

|                   |             |                                                            |            |                                             |
|-------------------|-------------|------------------------------------------------------------|------------|---------------------------------------------|
| <b>BDEG_04030</b> | BDEG_03415  | 1e-20 - clusters with fungi                                | BDEG_03421 | Unique gene (no hits at 1e-5)               |
|                   | BDEG_04029  | 1e-20 - with Cryptosporidium                               | BDEG_04031 | Unique gene (no hits at 1e-5)               |
|                   | BDEG_04028  | Unique gene (no hits at 1e-5)                              | BDEG_04032 | Unique gene (no hits at 1e-5)               |
| <b>BDEG_06393</b> | BDEG_04027  | 1e-20 - clusters with fungi                                | BDEG_04033 | 1e-20 - clusters with <i>Caenorhabditis</i> |
|                   | BDEG_06392  | 1e-30 - clusters with fungi                                | BDEG_06394 | 1e-30 - clusters with fungi                 |
|                   | BDEG_06391  | 1e-20 - with chlorophyte, stramenopiles, paramecium, tetra | BDEG_06395 | Unique gene (no hits at 1e-5)               |
| <b>BDEG_04225</b> | BDEG_06390  | 1e-30 - with Naegleria, fungi                              | BDEG_06396 | 1e-100 - clusters with metazoa              |
|                   | BDEG_04224  | 1e-20 - clusters with Phycomyces, plants                   | BDEG_04226 | 1e-5 - with <i>Thalassiosira</i>            |
|                   | BDEG_04223  | 1e-30 - clusters with Trichoplax                           | BDEG_04227 | Unique gene (no hits at 1e-5)               |
| <b>BDEG_06878</b> | BDEG_04222A | 1e-20 - clusters with Phycomyces                           | BDEG_04228 | 1e-40 - clusters with fungi                 |
|                   | BDEG_06877  | 1e-30 - clusters with <i>Ostreococcus</i>                  | BDEG_06879 | Unique gene (no hits at 1e-5)               |
|                   | BDEG_06876  | Unique gene (no hits at 1e-5)                              | BDEG_06880 | 1e-5 - clusters with fungi                  |
| <b>BDEG_04956</b> | BDEG_06875  | 1e-20 - clusters with fungi                                | BDEG_06881 | 1e-5 - clusters with zygomycetes            |
|                   | BDEG_04955  | 1e-5, <i>Batrachomyxium</i> only (6 copies)                | BDEG_04957 | 1e-20 - clusters with <i>Trichomonas</i>    |
|                   | BDEG_04954  | 1e-5, <i>Batrachomyxium</i> only (6 copies)                | BDEG_04958 | 1e-5 - clusters with <i>Dictyostelium</i>   |
|                   | BDEG_04953  | Unique gene (no hits at 1e-5)                              | BDEG_04959 | 1e-5 - clusters with <i>Paramecium</i>      |

4c Unlikely to be contamination HGT present in two recipient genomes.

| Key                                                             |
|-----------------------------------------------------------------|
| Taxon distribution of gene family suggests vertical inheritance |
| Phylogeny suggests vertical inheritance                         |
| Transposable elements                                           |
| Gene appears unique to genome                                   |
| Could not confirm vertical inheritance                          |
